# Supplementary material for: Mapping the biosynthetic pathway of a hybrid polyketide-nonribosomal peptide in a metazoan
Source: PubMed Central journal article supplement (PMC8363725; doi:10.1038/s41467-021-24682-9), 2021-08-13
Supplement: 41467_2021_24682_MOESM1_ESM.pdf [file 41467_2021_24682_MOESM1_ESM.pdf]

Supplementary Information

**Mapping the biosynthetic pathway of a hybrid polyketide-nonribosomal peptide in a  
metazoan**

Likui Feng<sup>1,2</sup>, Matthew T. Gordon<sup>1</sup>, Ying Liu<sup>1</sup>, Kari B. Basso<sup>1</sup>, Rebecca A. Butcher<sup>1\*</sup>

<sup>1</sup>Department of Chemistry, University of Florida, Gainesville, FL, 32611

<sup>2</sup>Present address: Lulu and Anthony Wang Laboratory of Neural Circuits and Behavior, The Rockefeller University, New York, NY 10065

\*Correspondence to: [butcher@chem.ufl.edu](mailto:butcher@chem.ufl.edu)

### a Thioesterase (TE) domains

PKS-1\_TE1 . . . . .DLKYPSNDLRELAHFYAEEIIAA. . . . .HAGNKRIFVMGHSMGGIMSREIVAEELKIWG  
 NRPS-1\_TE2 . . . . .GDTVDEVAKLYRLQIEESAENIETSKLVFI GASSAGTFAFSTSQLFADDD  
 Pik\_TE GTGTGTALLPADLDTALDAQARAILR. . . . .AAGDAPVVLLGHS GGALLAHELAFRLERAH  
 Sur\_TE NQ.TS. . . . .AIEDLEE L TDLYKQELN. . . . .LRPDRPFVLF GHS MG MITFRLAQKLEREG  
 Ybt\_TE LRHLE. . . . .PLRSITQLAALLANELEA. . . . .SVSPDTPLLLAGHS MG AQVAFETCRLLLEQRG  
 Rif\_TE RRHEP. . . . .PVDSIGGL TNRLLEVLR. . . . .PFGDRPLALF GHS MG AIGYELALRMPEAG

### b Condensation (C) domains

NRPS-1\_C2 . . . . .EKSSVSNPLSAI. . . . .QCSKLSPETLQLIFHHISIDGRSLAIFYQQFK  
 NRPS-1\_C3 . . . . .PSGASRPKQFSIQLWMSSKNKLLTISIHHLICDGRSLQILEHQLO  
 NRPS-1\_C4 IR.LLCDEPINV. . . . .LEGSPMIRASFI. . . . .SPEKHVAFHLHLHLLISDARSTQLTNSTMK  
 PKS-1\_C1 . . . . .NHLFE. . . . .IGKSTPLRVRVAEDCDNSRIHIVFNQHHILTDGWSMTVLSDTV  
 Arfa-C2 FSARR. . . . .Y. . . . .RLDVSQAPLMRLVYARDPALDRVVGILLFHHLAMDHIALEV. . . . .MR  
 VibH\_C QIEQDLQRSSTLIDAPITSHQVYRLSHS. . . . .EHLIYTRAHHIVLDGYGMMLFEQRLS  
 CDA\_C1 WMDRDRATPLPLDRPGLSSHALFTLGGG. . . . .RHLYYLGVHHIVIDGTSMAIFYERLA

### c Acyl-carrier protein (ACP) domains

PKS-1\_ACP3 . . . . .KTLQMAVRHKVCLAVGDVIESGLDIDESQLSTGFSE. LGI DSI LATVDLLNRLNQKY  
 PKS-1\_ACP4 ESDATVDRTEIRRKVS LAVFDLATETLSAEDLQ. SKGFTE. LGM DSI SIVDFVNRLNDKY  
 PKS-1\_ACP6 . . . . .KVKEEIKKKS LNFE E I FFEIVGITDISSKLNIPFMD. LGI DSI CMENLRYSLNKN.  
 Bac\_ACP . . . . .ADTLERVTKIIVDR LGVDEADV KLEASF KED. LGA DSI DVVELVMELEDE.  
 PKS-1\_ACP5 . . . . .MNF SVEDEEEVLELIKEKVSILMCSPTKLNKNIMDMGL DSKLIVEFLNFINST.  
 NRPS-1\_ACP7 . . . . .CTARPSRSM EILISILKDKMLLSTSEHEVETTPLPY LGI DSI RLAELEYHVASH.  
 PKS-1\_ACP1 . NIVDEQTNSSLSDAEIESTVRTIVKQFLDIEEDDINLLETGAV DSI L TS IEMVEAFGTAV  
 PKS-1\_ACP2 . KITKKVENEDQKRASKNMLHVWFEEENFGWTDIDNTGFFD LGL TSI QAVKL RNAIKSN.

### d Adenylation (A) domains

EntE\_A FFALLKLVAPV L. . . . .ALFSHQ R SELNAYASQIEPALLIADRQH. . . . .ALFSGDDFLNTFV  
 PKS-1\_A1 LLACVFLGLPYA P IDPTWPEP R QLFVKS KVSFTLE. . . . .N. . . . .CF. . . . .  
 SidN\_A3 IVGIMKSGNTYV P IEAGLPND R KSFLLRDSRAAMAFVCDN. . . . .NFDGVELPP. . . . .  
 Grs\_A ILAVLKA GAYV P IDIEYPKE R IQYILDDSQARMLLTQKHLVHLIHNIQFNGQVEIF. . . . .  
 NRPS-1\_A2 VLAWEAGLYPV P MHKDSKEA Q IEKTLEALGIEEA. . . . .FDSKDL CQ. . . . .  
 NRPS-1\_A3 LAVQFT. GAAYL P IDASYPEE R KKTILKDSVFNFE. . . . .YNGRVDQE. . . . .

EntE\_A TEHSSIRVVQLLNDSGEHNLDAINHPAEDFTATPSPADEVAY FQL SGG T TGT PKLIPRT  
 PKS-1\_A1 . . . . .SCNLKLRNFNSRTQFGSI YSIF TSG T TGT PKGVLMA  
 SidN\_A3 . ET. . . . .KV. . . . .LD. TKNQSF IENLSTQDTS DILNNYPENLDA YLLY TSG T TGT PKGVRVS  
 Grs\_A . EE. . . . .DT. . . . .IK. . . . .IREGTLNHVPSKSTDLA YVIY TSG T TGT PKGTMLE  
 NRPS-1\_A2 . . . . .TKLRIFNKSILYDLA YVTS TSG T TGT PKLVGTS  
 NRPS-1\_A3 . . . . .PRHRHFAISTDYCLS Y IIT TSG T TGT PK SVAIG

EntE\_A HNDYYSVRRSVE. . . . .ICQFTQQTRYLCAIPAA HNYAMSSPGSLGVFLAGGTVVLL  
 PKS-1\_A1 EQSVSSFM TSASK. . . . .QCMFRSNIRVLD SVKQV FD. . . . .VSVSNIIGSVLNGGVLIS  
 SidN\_A3 RHNLSFS DAWGKLIGNVAPKSLELGGVGKFLCLASRA FD. . . . .VHIGEMFLAWRFGLCAVT  
 Grs\_A HKGISNLK VFFEN. . . . .SLNVTEKDRIGQFASIS FD. . . . .ASVWEMFMALLTGASLYI  
 NRPS-1\_A2 FEGHSNLARQYTT. . . . .TYQISSRDTVGGVVDPS FD. . . . .IFFADIVK. . . . .TLVN  
 NRPS-1\_A3 AKSLLNLF LSSTL. . . . .TMKCSSSR TYQFTNFV FD. . . . .NSVLEVSMSIASQGTLVY

### e Peptidyl-carrier protein (PCP) domains

NRPS-1\_PCP3 .LPHPTLPNSLES DLS SIWTS L LNCPEPSPSDH. FF L IGGH S LLLVRLRHLIETKLGISL  
 NRPS-1\_PCP1 KAAISIARLSLTSSLKHWLEHYS NLEIPSDDDD. IFTLGVDSI AVMLAMQKLRSN. IEI  
 PKS-1\_PCP2 KREIVVMKNSLEEKVINVFSKI LGR. NVAPTDK. FESI GGN SLNAIQIAHRLAEELKIEI  
 NRPS-1\_PCP2 KLLGLVEVRKKLELIIA AFKKFL DNTDVTKSTD. FFQA GGH SLTAMRLIDHLSDDLVEEI  
 Yer\_PCP1 .AEADLPQGDIEKQVAALWQQL LSTGNVTRETD. FFQQGGD SLLATRLTGQLHQAG. YEA  
 PKS-1\_PCP1 ESLKLPKSTSCFVIAEIKWET LGISILNDANPN FFSLGGD SLSALQVVWVKVQKKTDRIV

**Supplementary Figure 1. Domain sequence alignments of PKS-1 and NRPS-1 with known functional domains.** **a** Sequence alignment of TE domains with Pik\_TE (Pikromycin TE domain, PDB ID: 2H7Y), Sur\_TE (Surfactin TE domain, PDB ID: 2RON), Yer\_TE (Yersiniabactin TE domain, PDB ID: 6BA8), and Rif\_TE (Rifamycin TE domain, PDB ID: 3FLA). Sequences used for TE domains are PKS-1\_TE<sub>1</sub> (7559-7610) and NRPS-1\_TE<sub>2</sub> (2771-2820). The catalytic serine residue is labeled with an asterisk. **b** Sequence alignment of C domains with ArfA\_C<sub>2</sub> (Arthrofactin module A C<sub>2</sub> domain), VibH\_C (Vibriobactin free-standing C domain VibH, PDB ID: 1L5A), CDA\_C<sub>1</sub> (Calcium-dependent antibiotic synthase C<sub>1</sub> domain, PDB ID: 4JN3). Sequences used for C domains are PKS-1\_C<sub>1</sub> (6653-6701), NRPS-1\_C<sub>2</sub> (520-563), NRPS-1\_C<sub>3</sub> (1457-1502), and NRPS-1\_C<sub>4</sub> (1895-1947). In the HHxxxDG motif, the second histidine (asterisk) serves as a catalytic base, and the aspartate (asterisk) is critical for the structural integrity of the active site. **c** Sequence alignment of NRPS-1\_ACP<sub>7</sub> with PKS-1\_ACP domains and *Bacillus subtilis* ACP (GenBank accession no. P80643, PDB ID: 1HY8). The conserved active site serine is marked with asterisk. Protein sequences used are PKS-1\_ACP<sub>1</sub> (719-776), PKS-1\_ACP<sub>2</sub> (1776-1833), PKS-1\_ACP<sub>3</sub> (2792-2846), PKS-1\_ACP<sub>4</sub> (2940-2997), PKS-1\_ACP<sub>5</sub> (3471-3526), PKS-1\_ACP<sub>6</sub> (5154-5207), and NRPS-1\_ACP<sub>7</sub> (267-320). **d** Sequence alignment of A domains with EntE\_A (Enterobactin module E, PDB ID: 3RG2), SidN\_A<sub>3</sub> (A<sub>3</sub> domain in Siderophore N synthetase, PDB ID: 3ITE), Grs\_A (Gramicidin S, PDB ID: 1AMU). Sequences used for A domains are PKS-1\_A<sub>1</sub> (7044-7167), NRPS-1\_A<sub>2</sub> (900-1019), and NRPS-1\_A<sub>3</sub> (2274-2398). The conserved glycine residue in the flexible loop involved in the interaction with the pyrophosphate leaving group during amino acid loading is marked with an asterisk.<sup>1</sup> **e** Sequence alignment of PKS-1\_PCP domains, NRPS-1\_PCP domains, and Yer\_PCP<sub>1</sub> (Yersiniabactin synthetase PCP1 domain, GenBank accession no. Q7CI41, PDB ID: 5U3H). The serine residue for phosphopantetheinyl posttranslational modification is located in the conserved PCP motif DXFFXLGGDSL and is marked with an asterisk. Protein sequences are PKS-1\_PCP<sub>1</sub> (6462-6521), PKS-1\_PCP<sub>2</sub> (7424-7481), NRPS-1\_PCP<sub>3</sub> (1289-1346), NRPS-1\_PCP<sub>4</sub> (1700-1758), and NRPS-1\_PCP<sub>5</sub> (2648-2705). Alignment was generated by Clustal Omega 1.2.4 and ESPrpt 3.0.<sup>2</sup>

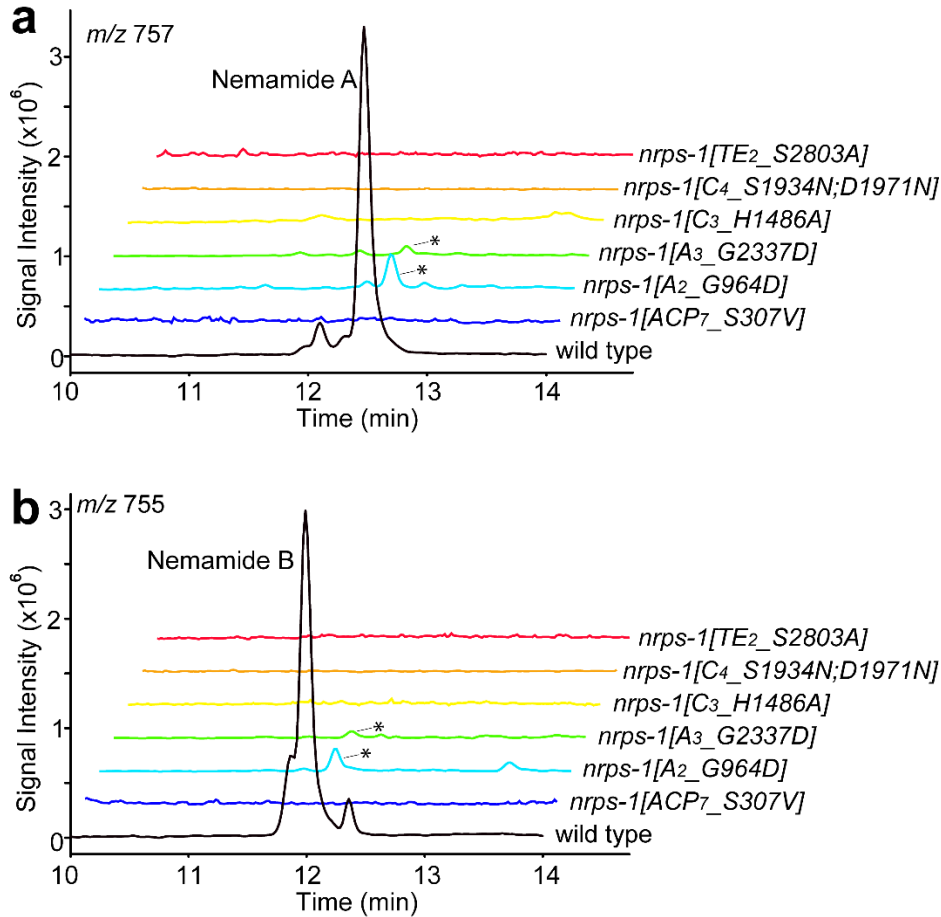

**Supplementary Figure 2. Nemamide production in wild-type and *nrps-1* domain mutants.**

Extracted ion chromatograms for nemamide A (a) and nemamide B (b) in wild type, *nrps-1(reb8[ACP7\_S307V])*, *nrps-1(reb32[A2\_G964D])*, *nrps-1(reb31[A3\_G2337D])*, *nrps-1(reb10[C3\_H1486A])*, *nrps-1(gk186409[C4\_S1934N]; gk186410[C4\_D1971N])*, and *nrps-1(reb12[TE2\_S2803A])* worms. The *nrps-1(gk186409[C4\_S1934N]; gk186410[C4\_D1971N])* mutant was obtained from the Caenorhabditis Genetics Center and backcrossed four times with wild type. As indicated by the asterisks (\*), both the *nrps-1(reb32[A2\_G964D])* and the *nrps-1(reb31[A3\_G2337D])* strains produced small amounts of nemamides; the *nrps-1(reb32[A2\_G964D])* strain produced  $15.7 \pm 3.7\%$  nemamide A relative to wild type, and the *nrps-1(reb31[A3\_G2337D])* strain produced  $2.7 \pm 0.8\%$  nemamide A relative to wild type, suggesting that the A domains in these mutants have some residual activity. Note that the retention times of the nemamides in the Supplementary Information are different than in the main text due to the fact that the samples were analyzed on different columns.

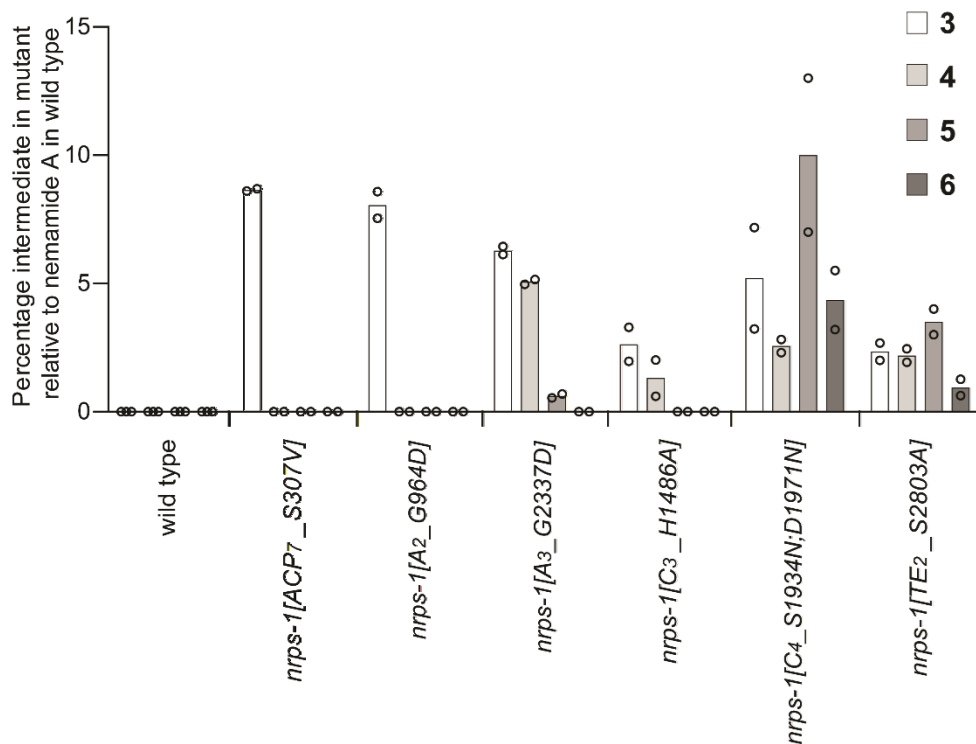

**Supplementary Figure 3. Production of intermediates in wild type and *nrps-1* domain mutants.**

The production of nemamide A (1) and intermediates 3, 4, 5, and 6 in wild type, *nrps-1*(*reb8*[ACP7\_S307V]), *nrps-1*(*reb32*[A2\_G964D]), *nrps-1*(*reb31*[A3\_G2337D]), *nrps-1*(*reb10*[C3\_H1486A]), *nrps-1*(*gk186409*[C4\_S1934N]; *gk186410*[C4\_D1971N]), and *nrps-1*(*reb12*[TE2\_S2803A]) worms. The *nrps-1*(*gk186409*[C4\_S1934N]; *gk186410*[C4\_D1971N]) mutant was obtained from the Caenorhabditis Genetics Center and backcrossed four times with wild type. Percentage for each intermediate in each strain was determined by comparing the amount of the intermediate (as gauged by UV at 280 nm) relative to the mean amount of nemamide A (as gauged by UV at 280 nm) in wild type. Data represent the mean of data points (indicated as open circles), n = 3 independent experiments for wild type and n = 2 independent experiments for all mutants. In each experiment, the worm strain was grown in large-scale culture, and the worms were collected for extraction of nemamide (for wild type) and intermediates (for wild type and mutants). Source data are provided as a Source Data file.

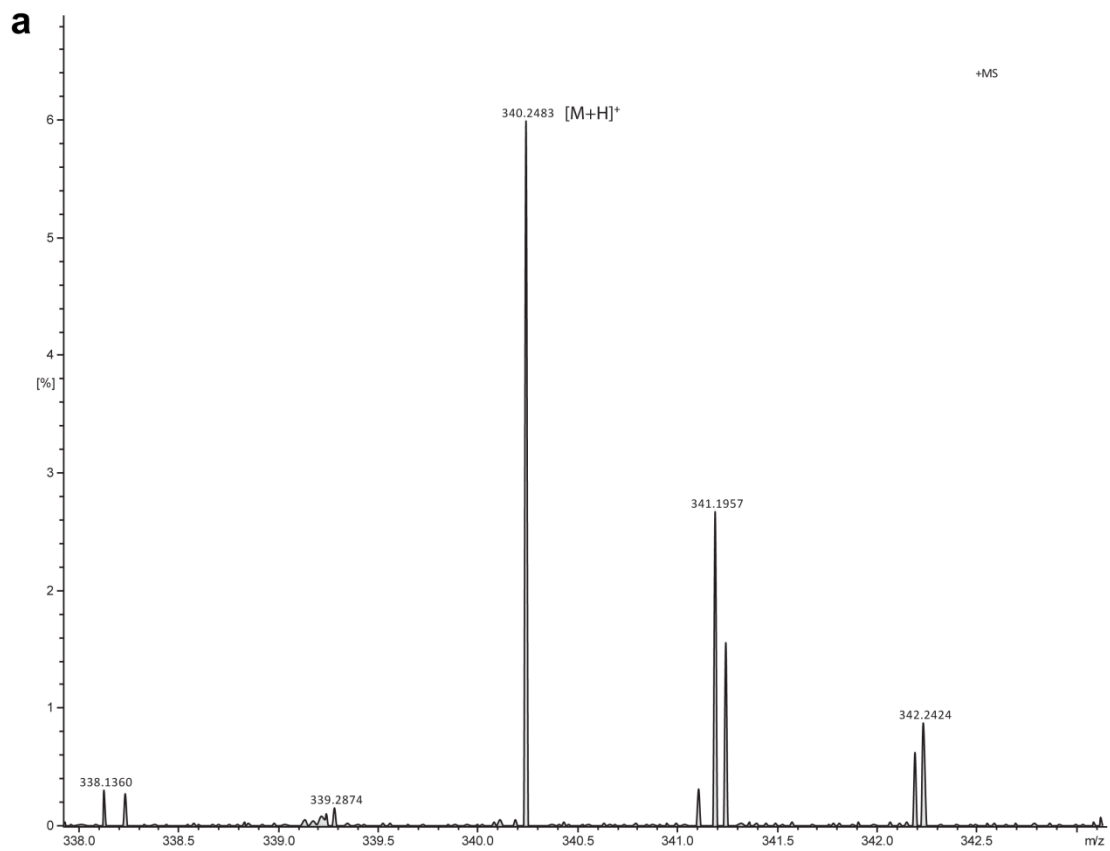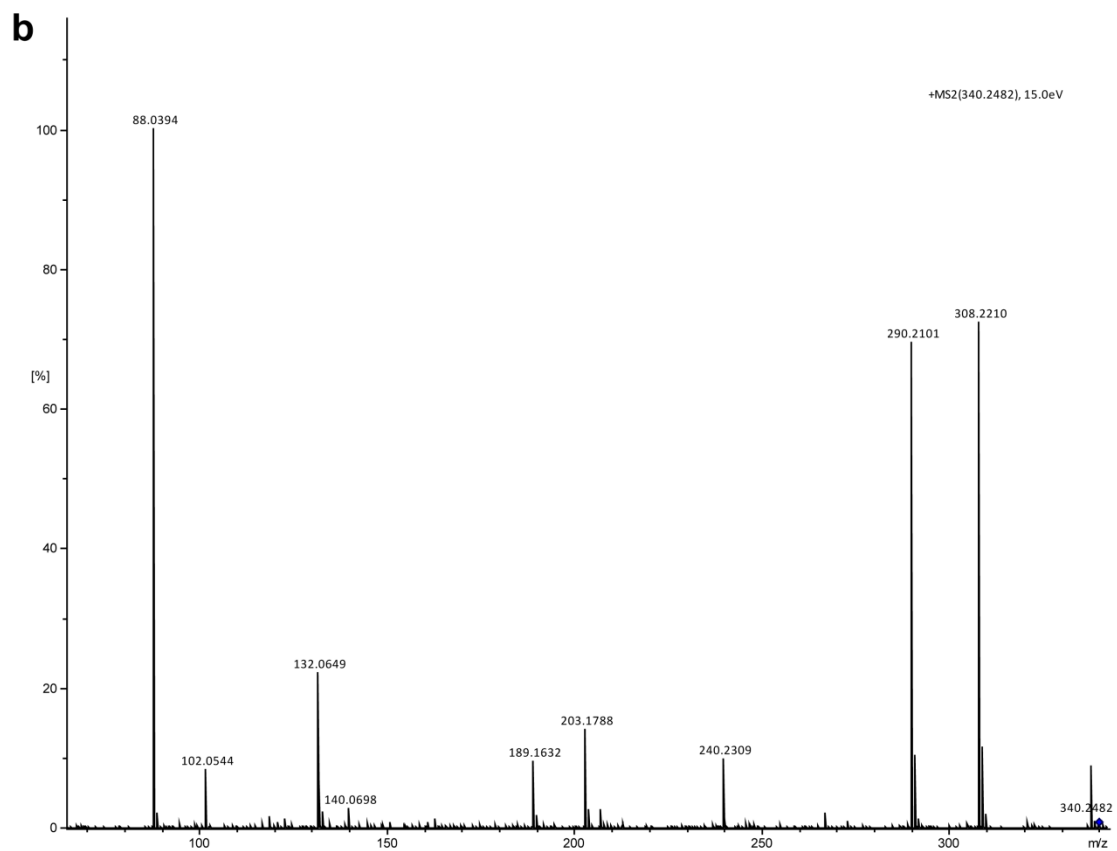

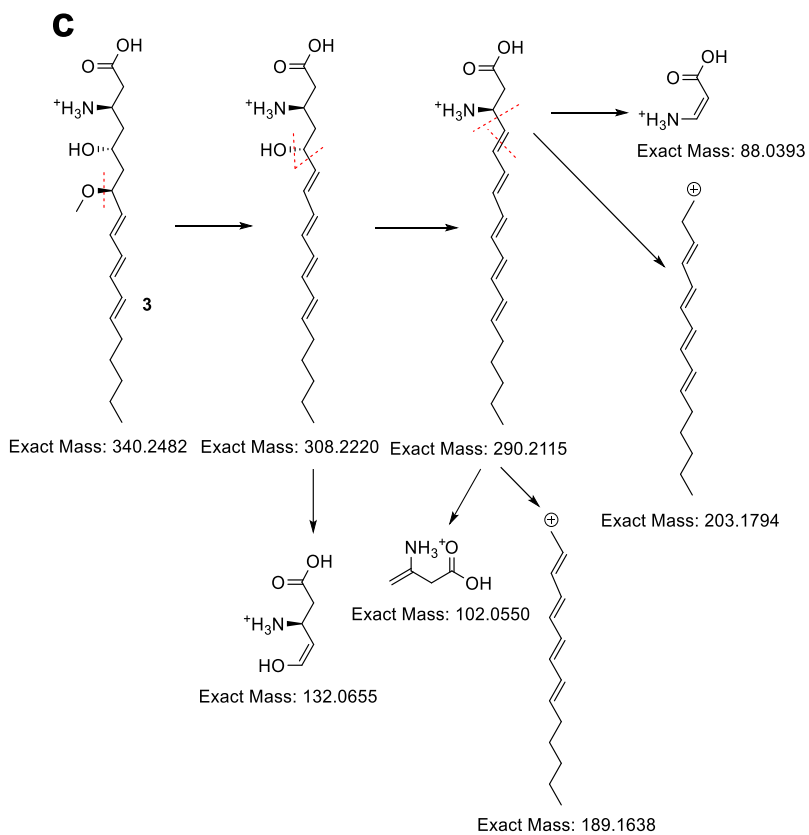

**Supplementary Figure 4. Mass spectrometry analysis of intermediate 3. a,b HR-LC-MS/MS of intermediate 3. c Analysis of the fragmentation patterns.**

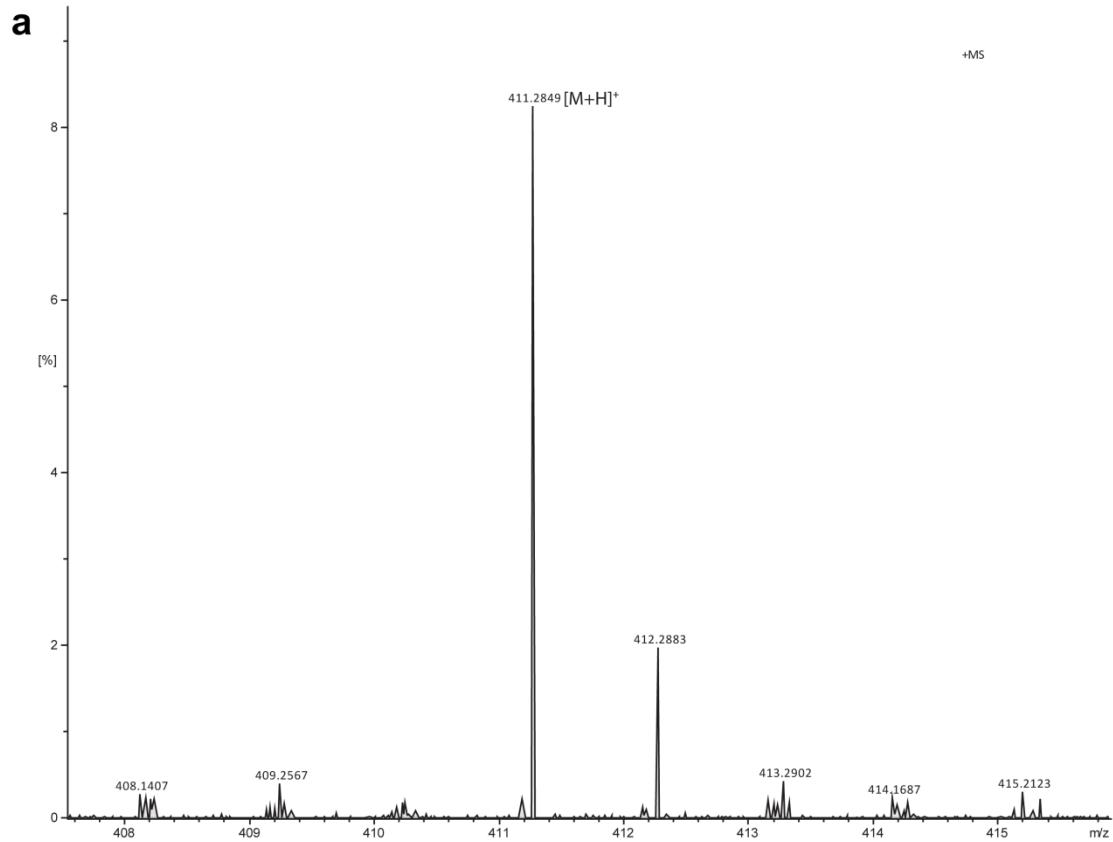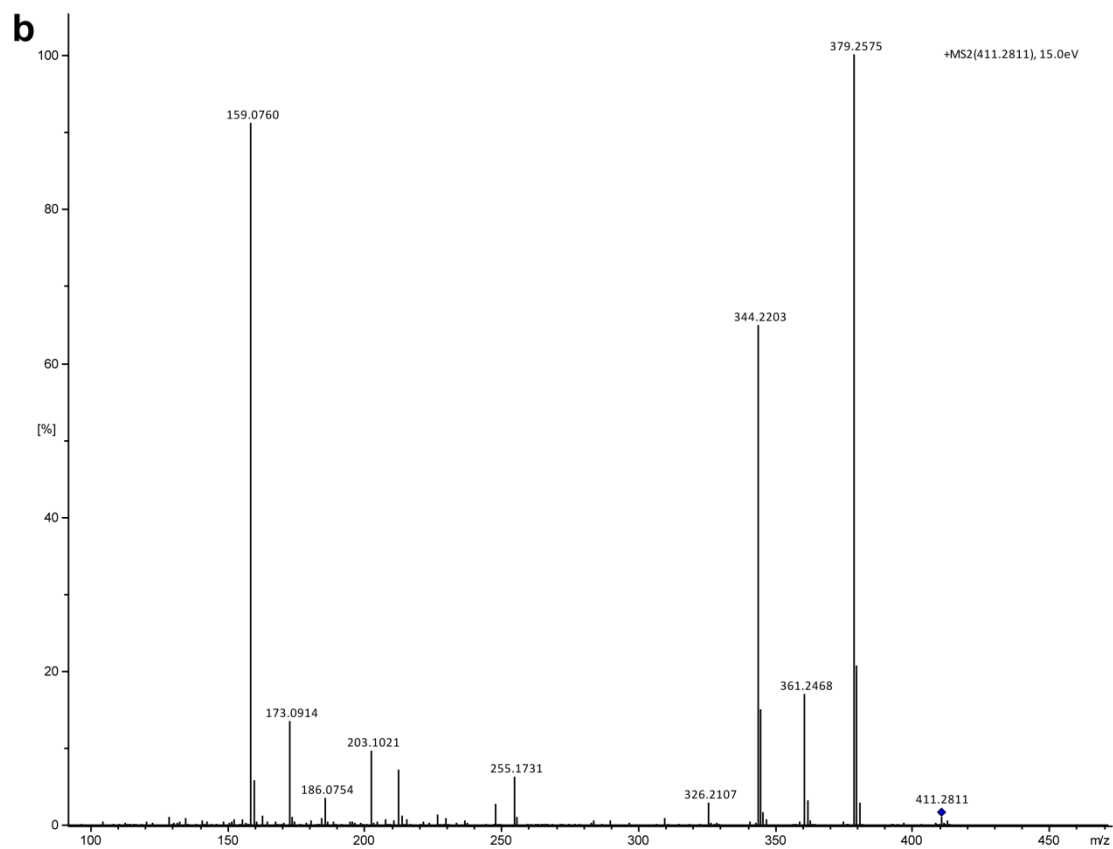



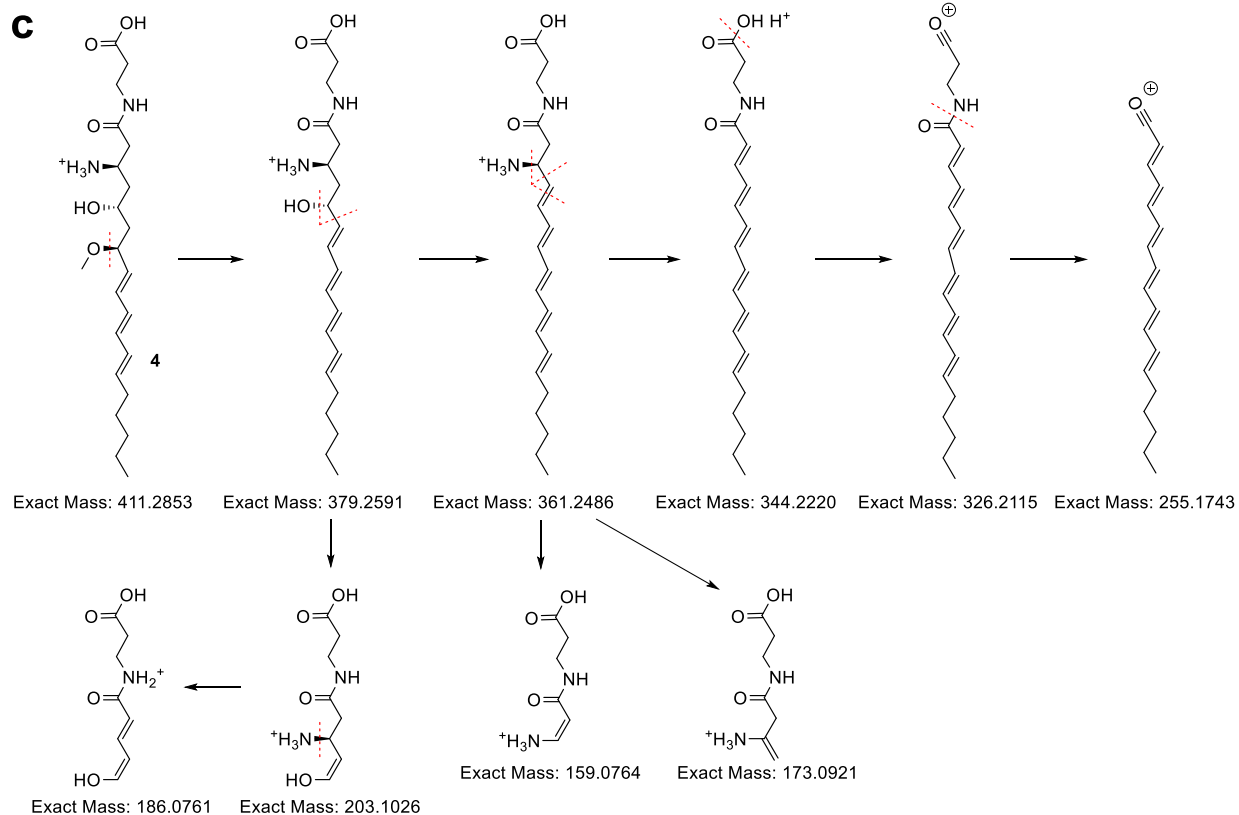

**Supplementary Figure 5. Mass spectrometry analysis of intermediate 4. a,b HR-LC-MS/MS of intermediate 4. c Analysis of the fragmentation patterns.**

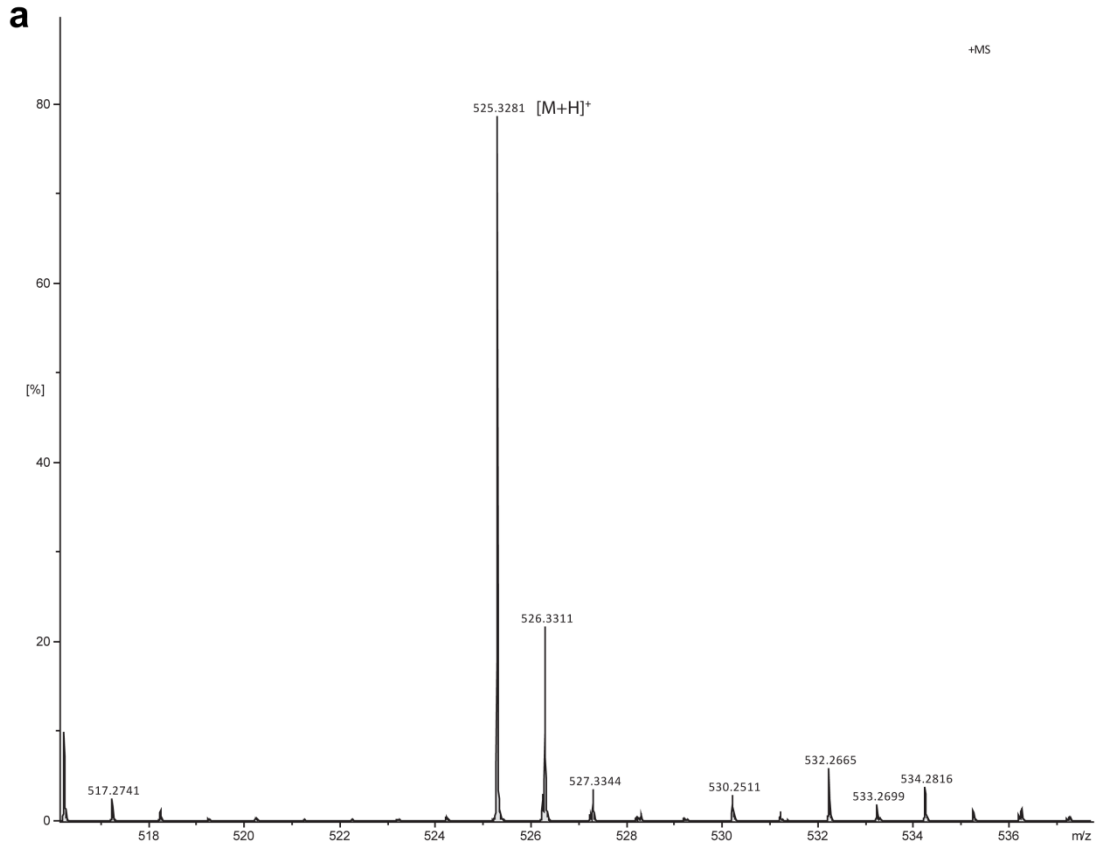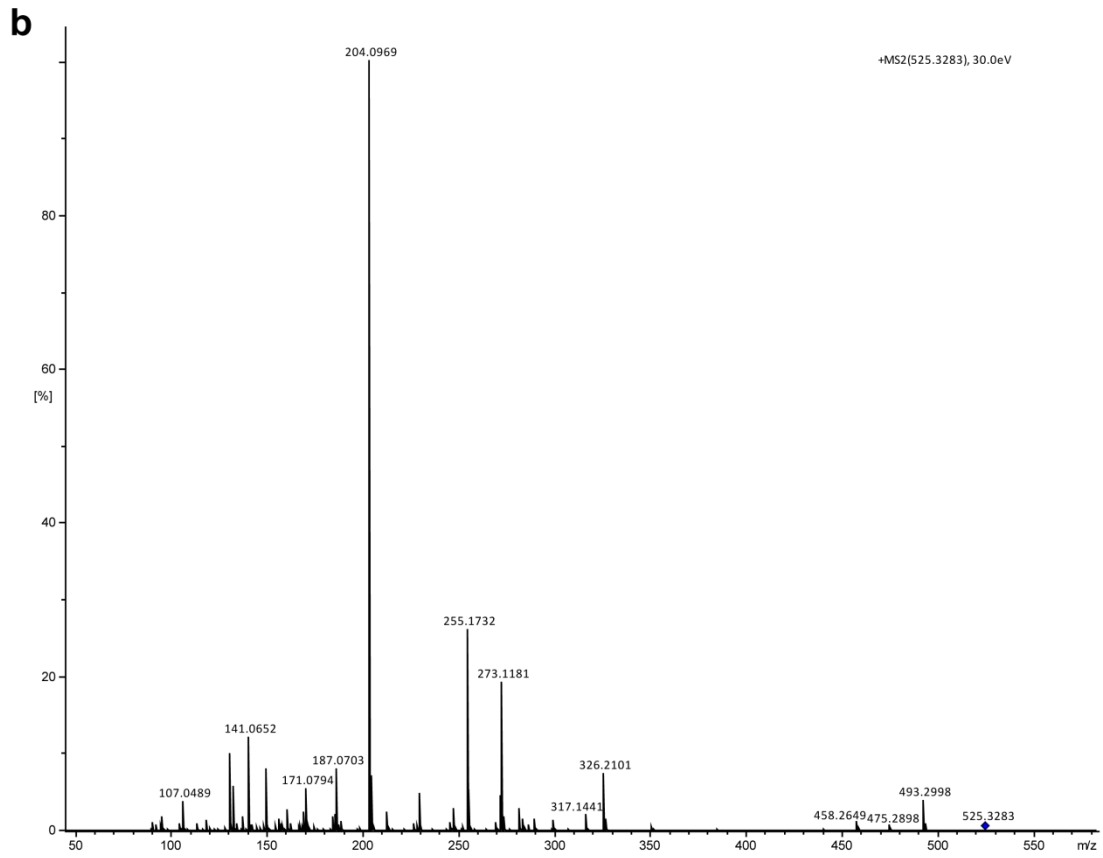

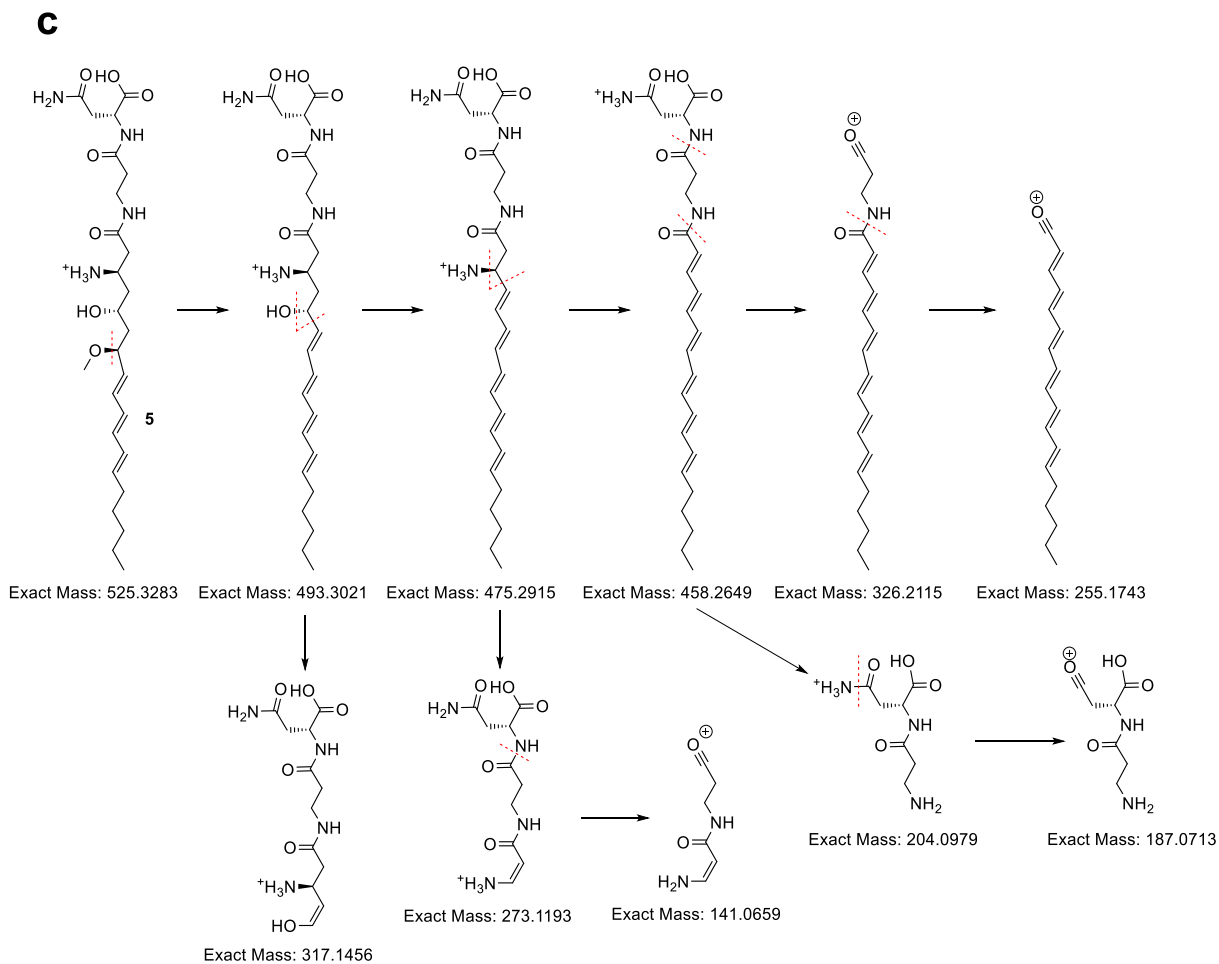

**Supplementary Figure 6. Mass spectrometry analysis of intermediate 5. a,b HR-LC-MS/MS of intermediate 5. c Analysis of the fragmentation patterns.**

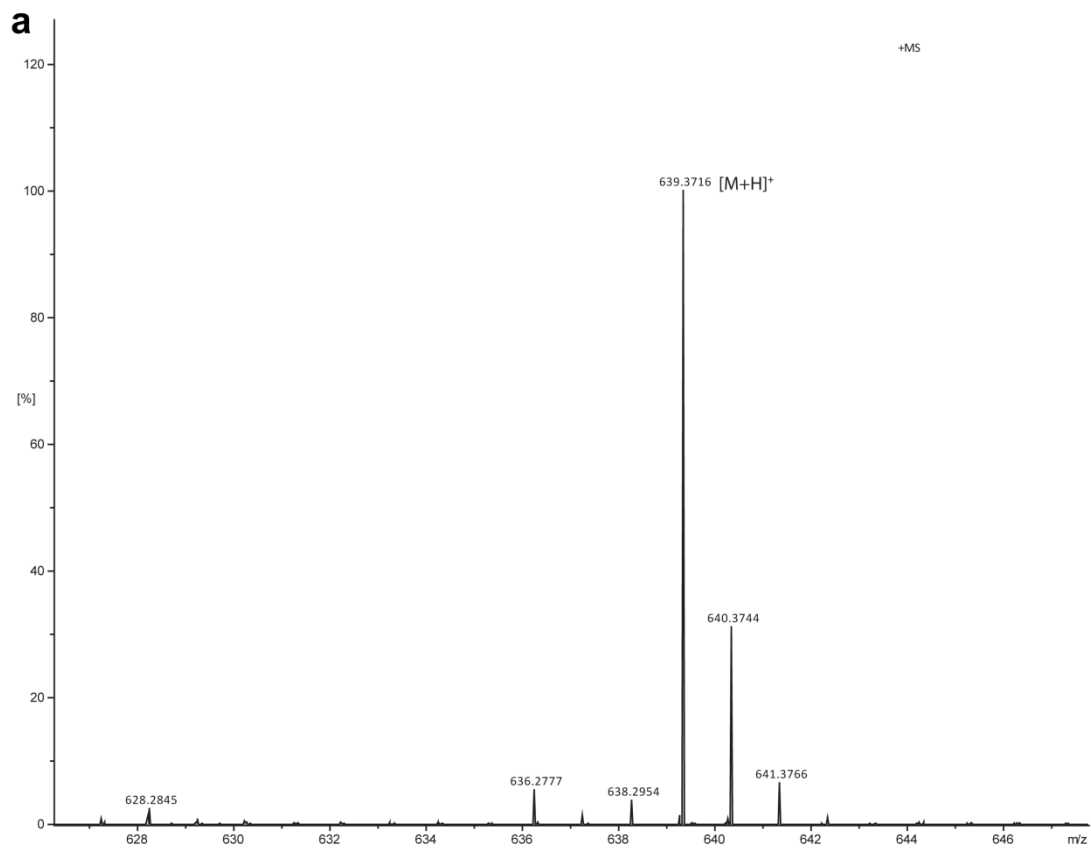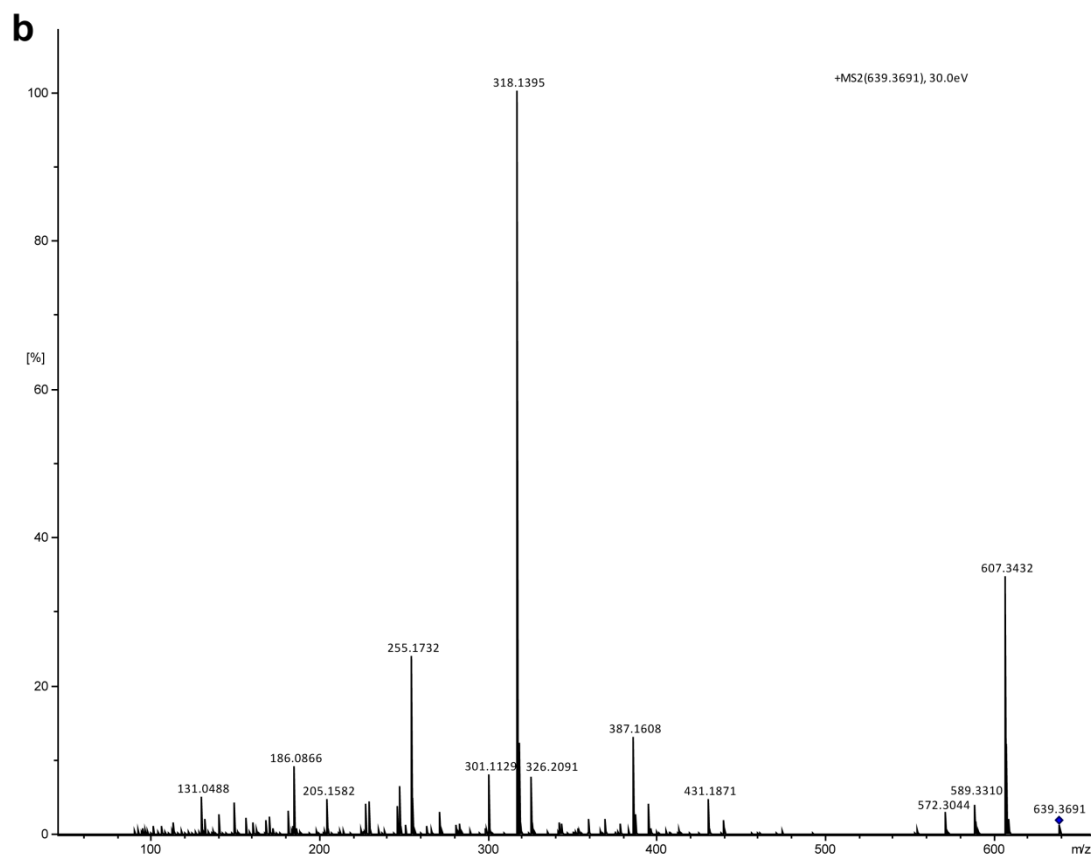

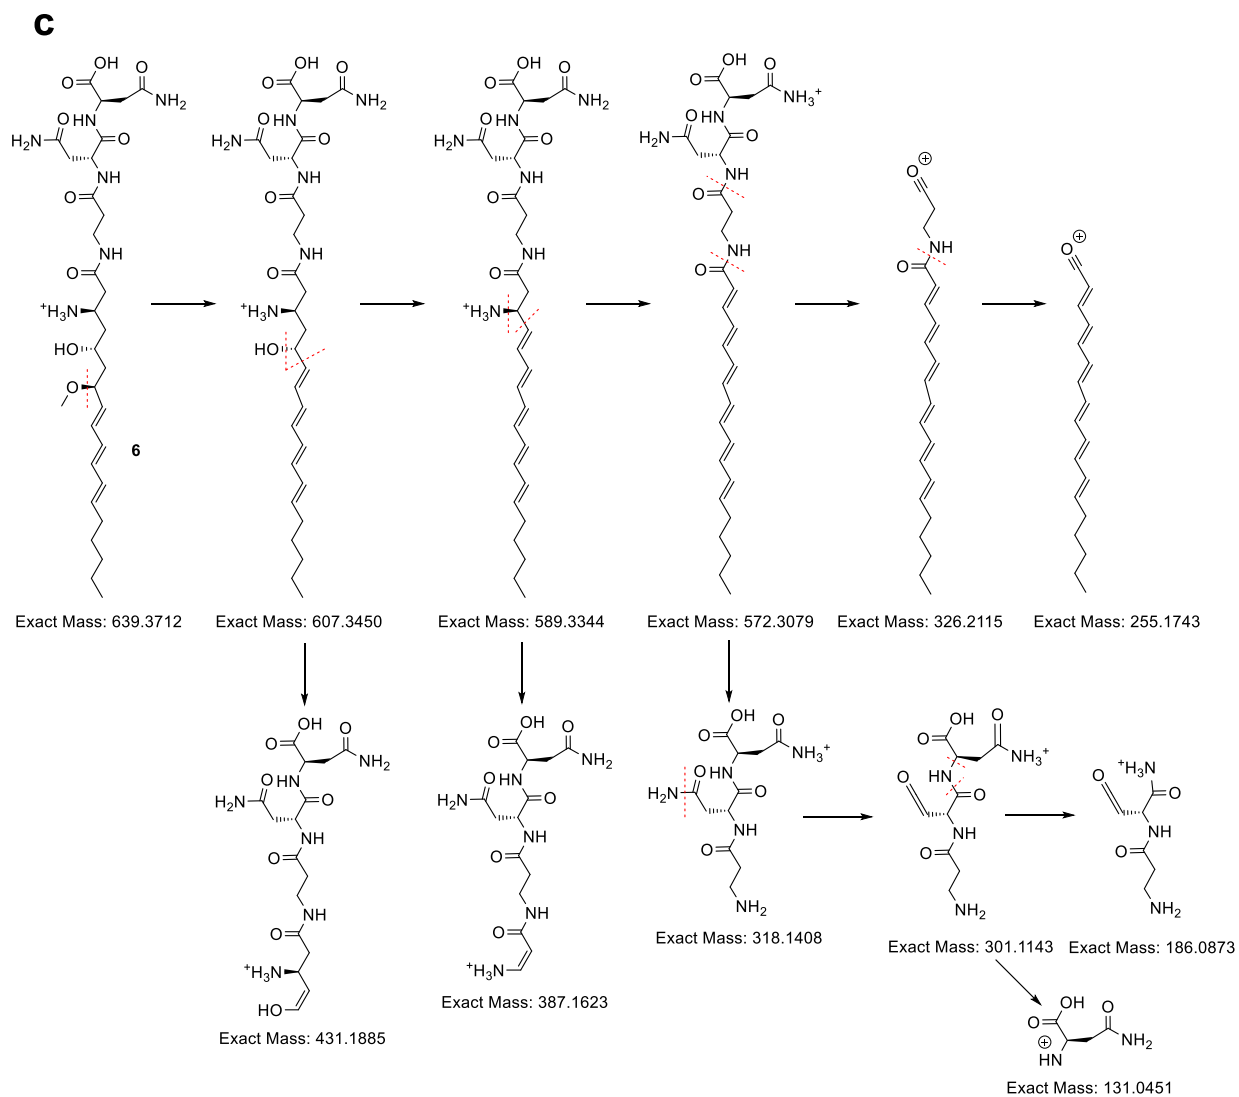

**Supplementary Figure 7. Mass spectrometry analysis of intermediate 6. a,b HR-LC-MS/MS of intermediate 6. c Analysis of the fragmentation patterns.**

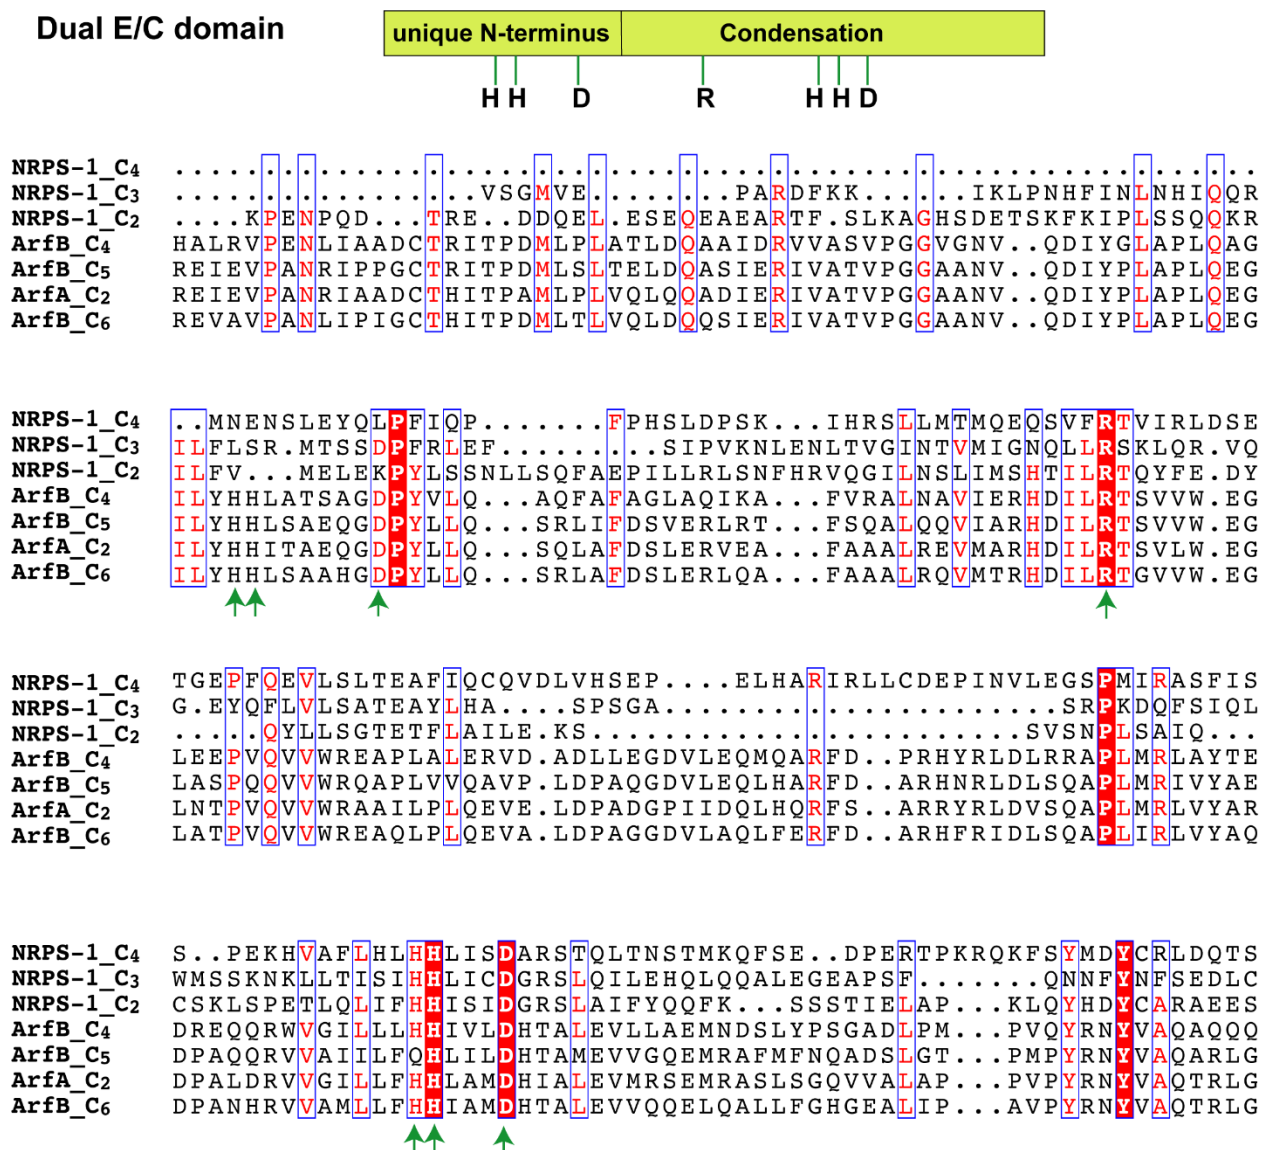

**Supplementary Figure 8. Domain sequence alignments of the C domains in NRPS-1 with the dual epimerase (E)/C domains from the arthrofactin biosynthetic pathway.** Dual E/C domains have a unique N-terminus with catalytic residues HH-D, followed by a common C domain with a catalytic motif R-HHXXXD.<sup>3</sup> The sequences of the C<sub>2</sub> domain from NRPS-1 (residues 401-586), the C<sub>3</sub> domain from NRPS-1 (residues 1361-1524), and the C<sub>4</sub> domain from NRPS-1 (residues 1815-1974) were compared to the sequences of the C domains of ArfB from the arthrofactin biosynthetic pathway. Essential residues for catalysis are indicated by arrows. The C domains in NRPS-1 are missing the catalytic residues in the N-terminus that are characteristic of dual E/C domains.

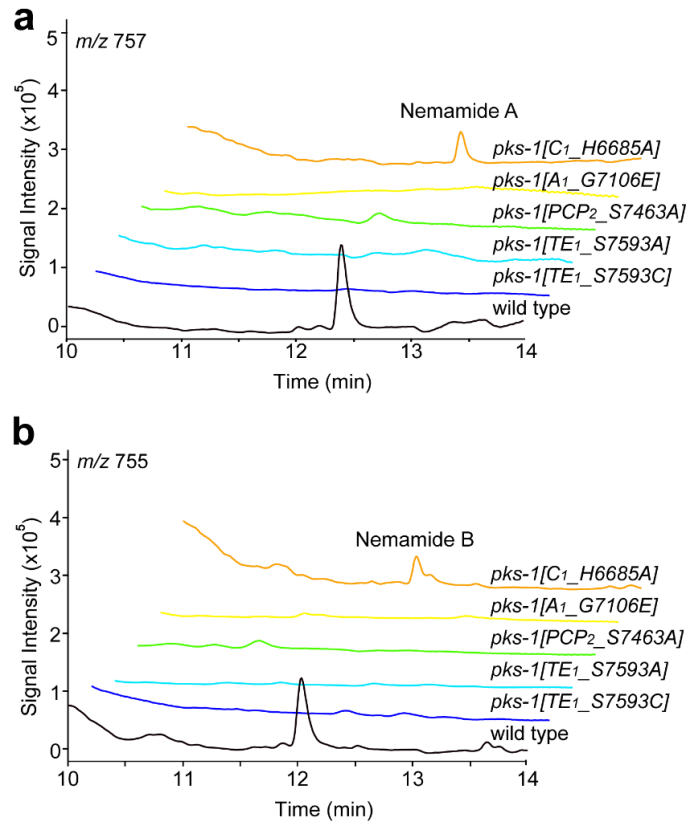

**Supplementary Figure 9. Nemamide production in wild type and *pks-1* mutant strains.**

Extracted ion chromatogram for nemamide A (a) and nemamide B (b) in wild type and *pks-1*(*reb29*[PCP<sub>2</sub>\_S7463A]), *pks-1*(*reb22*[A<sub>1</sub>\_G7106E]), *pks-1*(*reb9*[C<sub>1</sub>\_H6685A]), *pks-1*(*reb11*[TE<sub>1</sub>\_S7593A]), and *pks-1*(*reb13*[TE<sub>1</sub>\_S7593C]) mutant worms, containing mutations in the C-terminal NRPS module of PKS-1. Note that the nemamides could not be detected in the crude extracts of small-scale cultures of *pks-1*(*reb22*[A<sub>1</sub>\_G7106E]) (as shown here), but they could be detected in very small amounts in the partially purified extracts of large-scale cultures of *pks-1*(*reb22*[A<sub>1</sub>\_G7106E]) (as shown in Fig. 3). Note that the retention times of the nemamides in the Supplementary Information are different than in the main text due to the fact that the samples were analyzed on different columns.

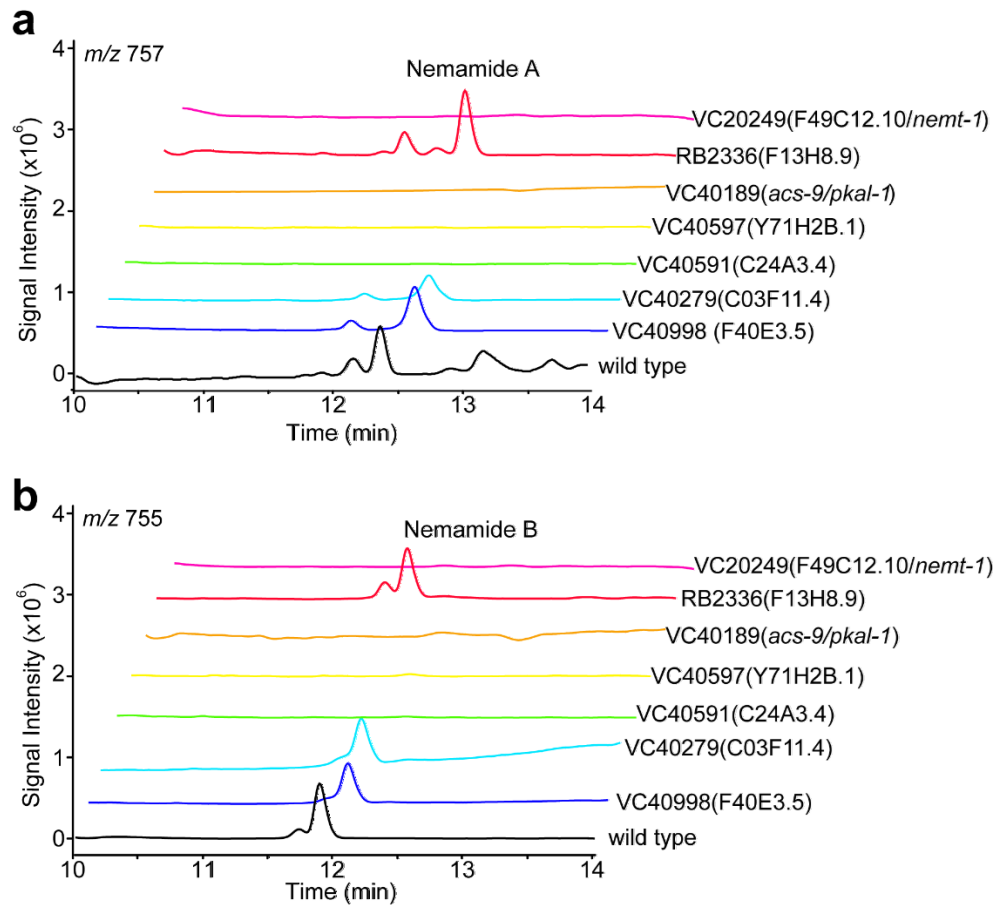

**Supplementary Figure 10. Initial screen of available mutants for nemamide production.**

Extracted ion chromatogram for nemamide A (**a**) and nemamide B (**b**) in wild-type and the indicated mutant strains from Supplementary Table 2. Note that the retention times of the nemamides in the Supplementary Information are different than in the main text due to the fact that the samples were analyzed on different columns.



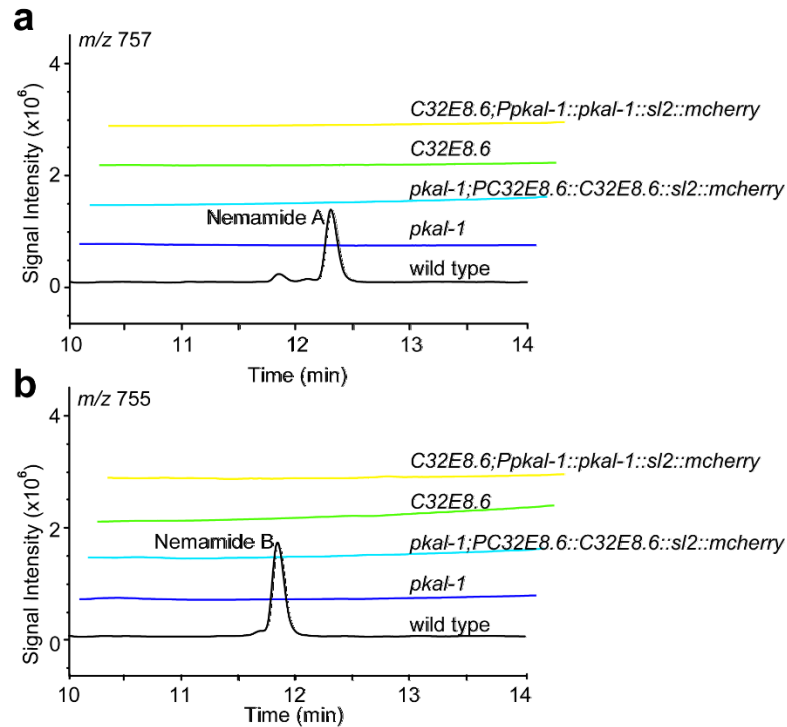

**Supplementary Figure 11. Failure of T20F7.7 (*pkal-1*) and C32E8.6 to rescue each other.**

Extracted ion chromatogram for nemamide A (a) and nemamide B (b) in wild-type, the *pkal-1* mutant, the *pkal-1* mutant in which C32E8.6 was expressed under the control of its own promoter, the C32E8.6 mutant, and the C32E8.6 mutant in which *pkal-1* was expressed under the control of its own promoter. Note that the retention times of the nemamides in the Supplementary Information are different than in the main text due to the fact that the samples were analyzed on different columns.

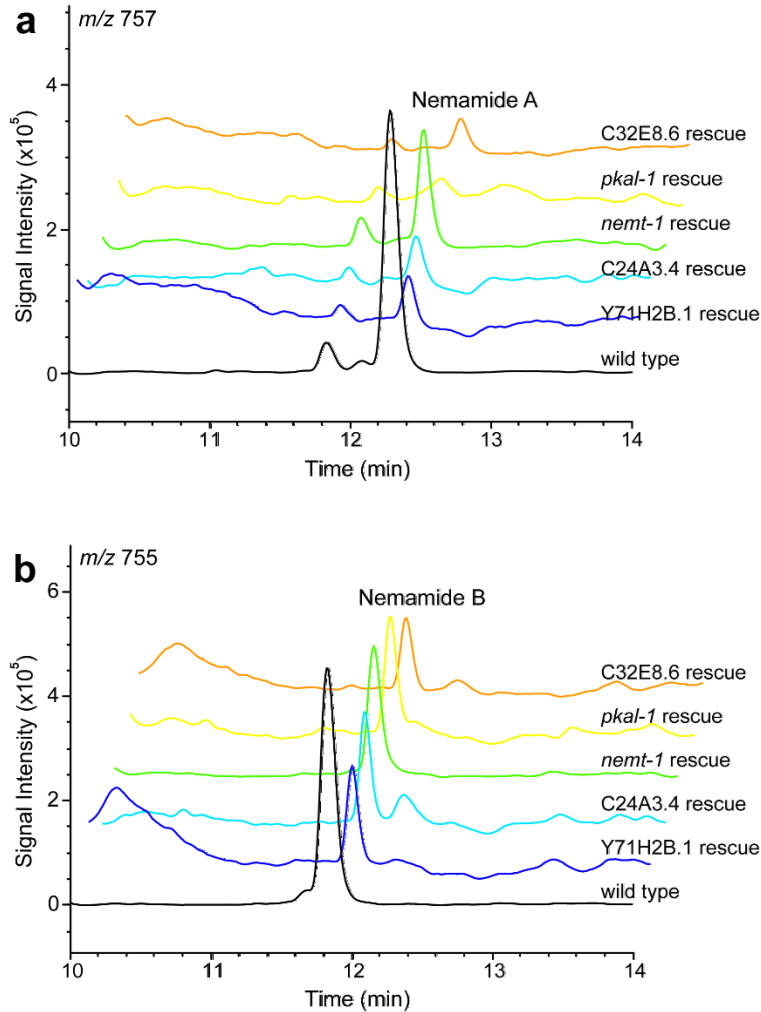

**Supplementary Figure 12. Nemamide production in wild type and mutant rescue strains.** Extracted ion chromatograms for nemamide A (a) and nemamide B (b). Mutants were rescued by complementing with *sl2::mCherry* plasmids under control of gene promoters::genes. Note that the retention times of the nemamides in the Supplementary Information are different than in the main text due to the fact that the samples were analyzed on different columns.

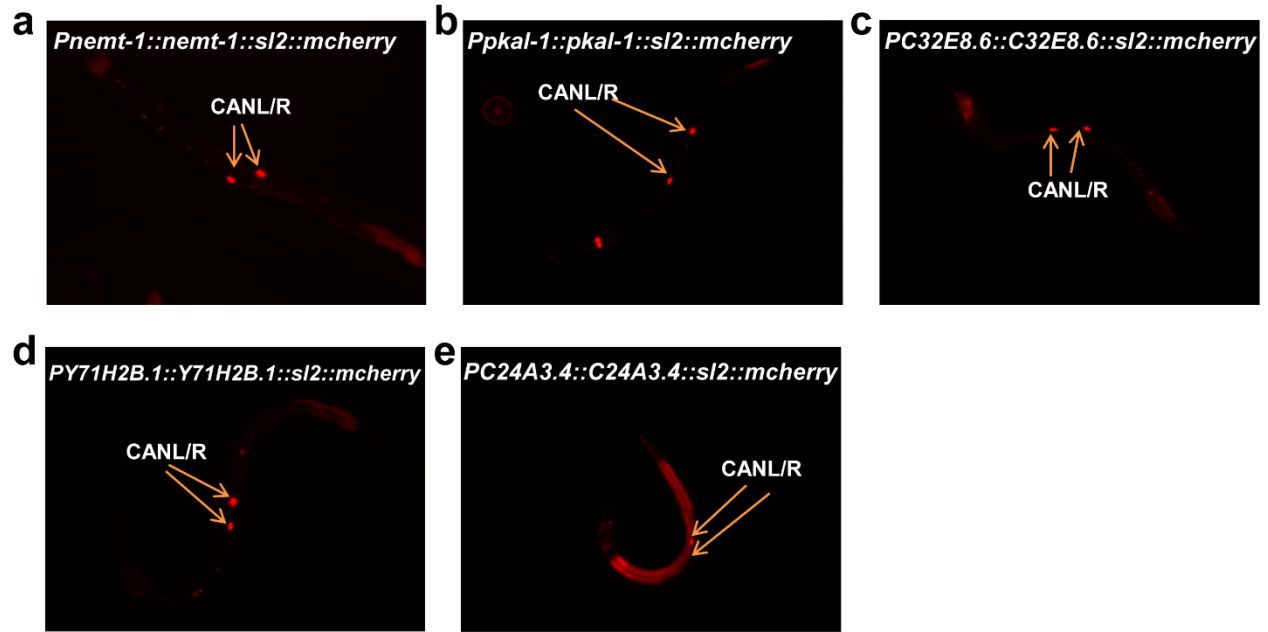

**Supplementary Figure 13. Imaging of translational reporter strains.** Analysis of in translational reporter worm strains *Pnemt-1::nemt-1::sl2::mcherry* (a), *Ppkal-1::pkal-1::sl2::mcherry* (b), *PC32E8.6::C32E8.6::sl2::mcherry* (c), *PY71H2B.1::Y71H2B.1::sl2::mcherry* (d), and *PC24A3.4::C24A3.4::sl2::mcherry* (e) demonstrated expression of nemamide biosynthetic genes primarily in the CANs.

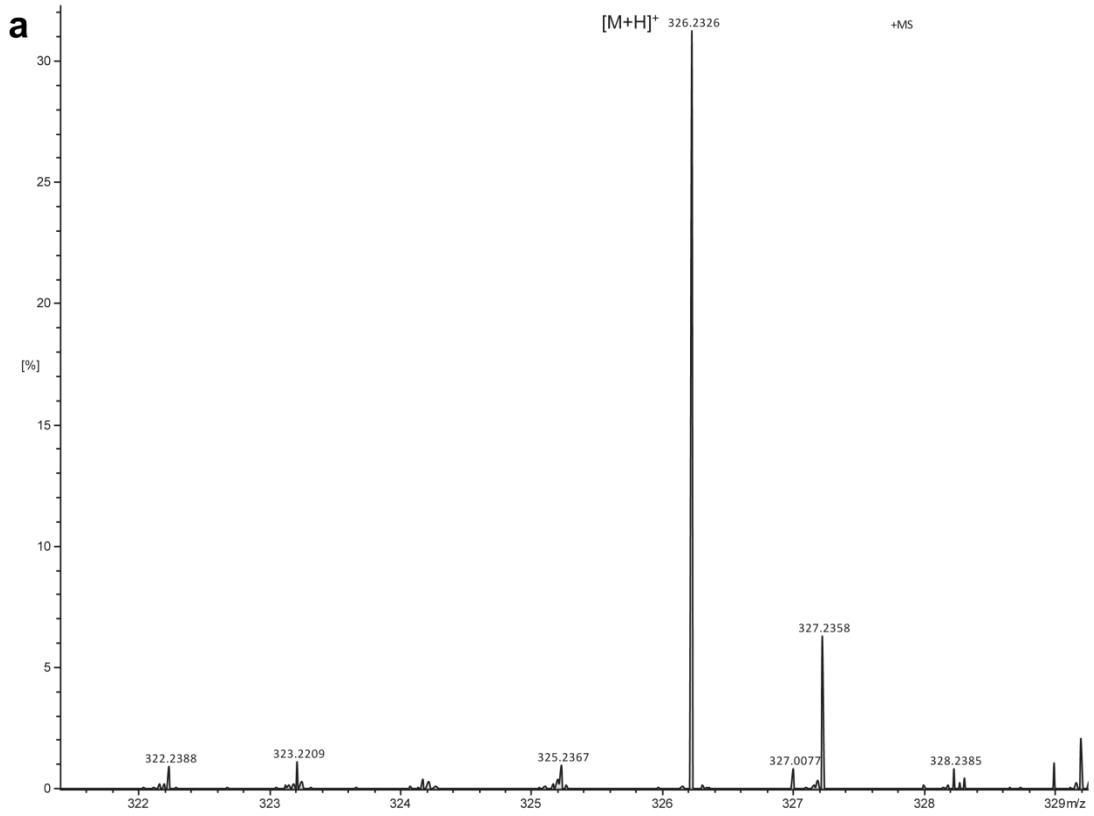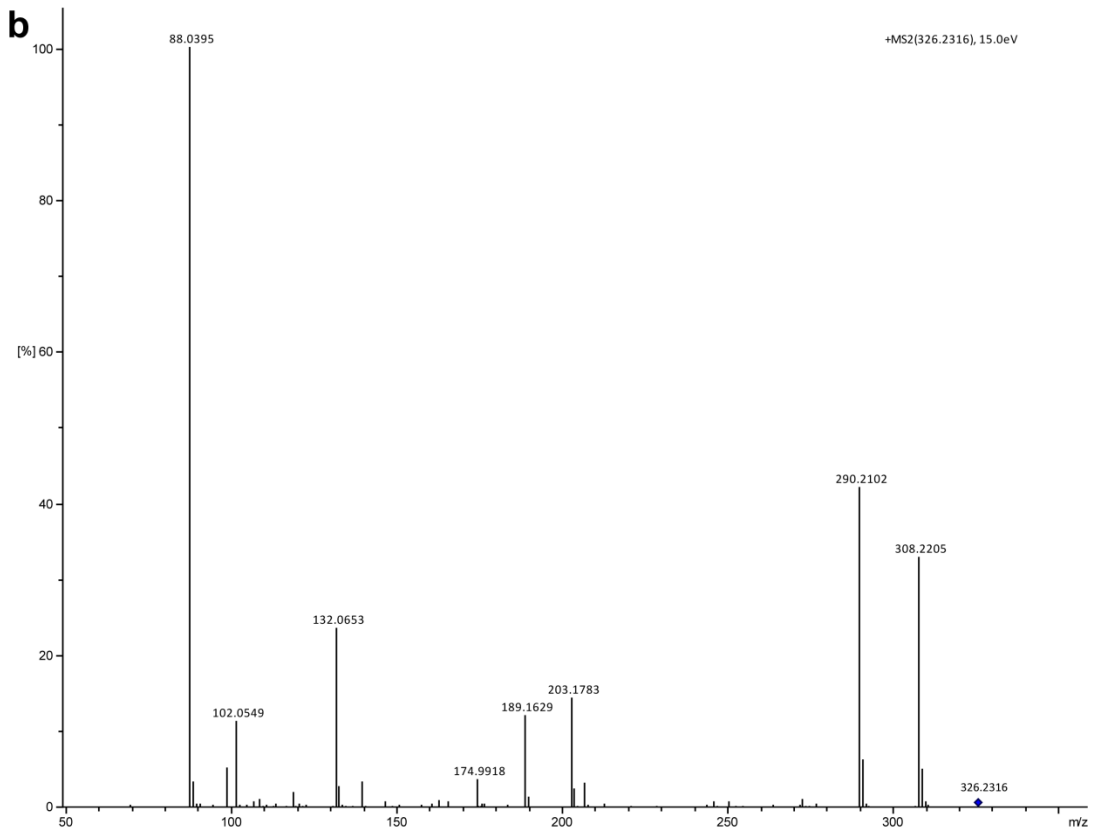

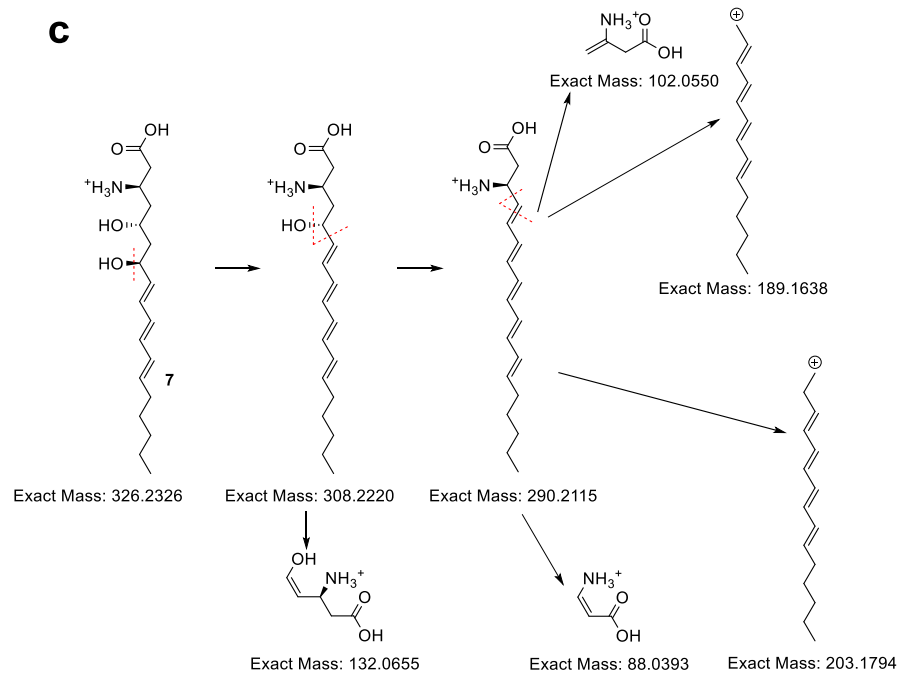

**Supplementary Figure 14. Mass spectrometry analysis of intermediate 7. a,b** HR-LC-MS/MS of intermediate 7. **c** Analysis of the fragmentation patterns.

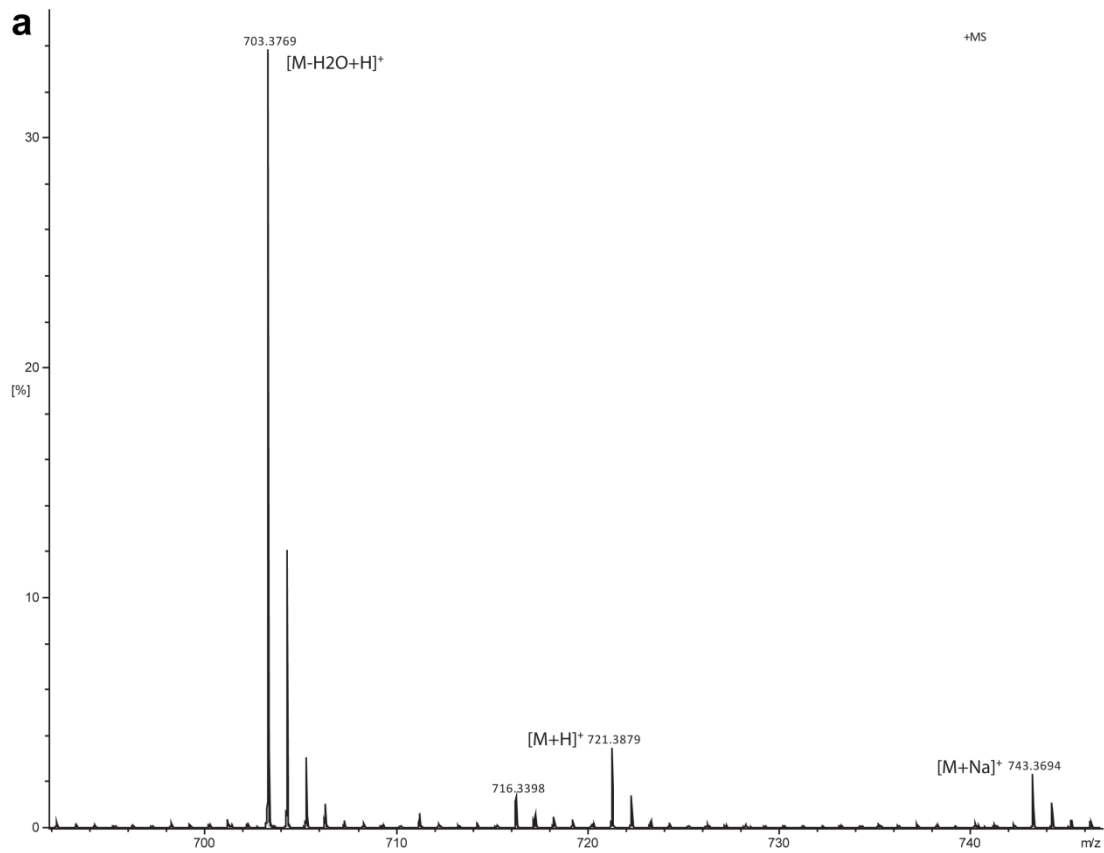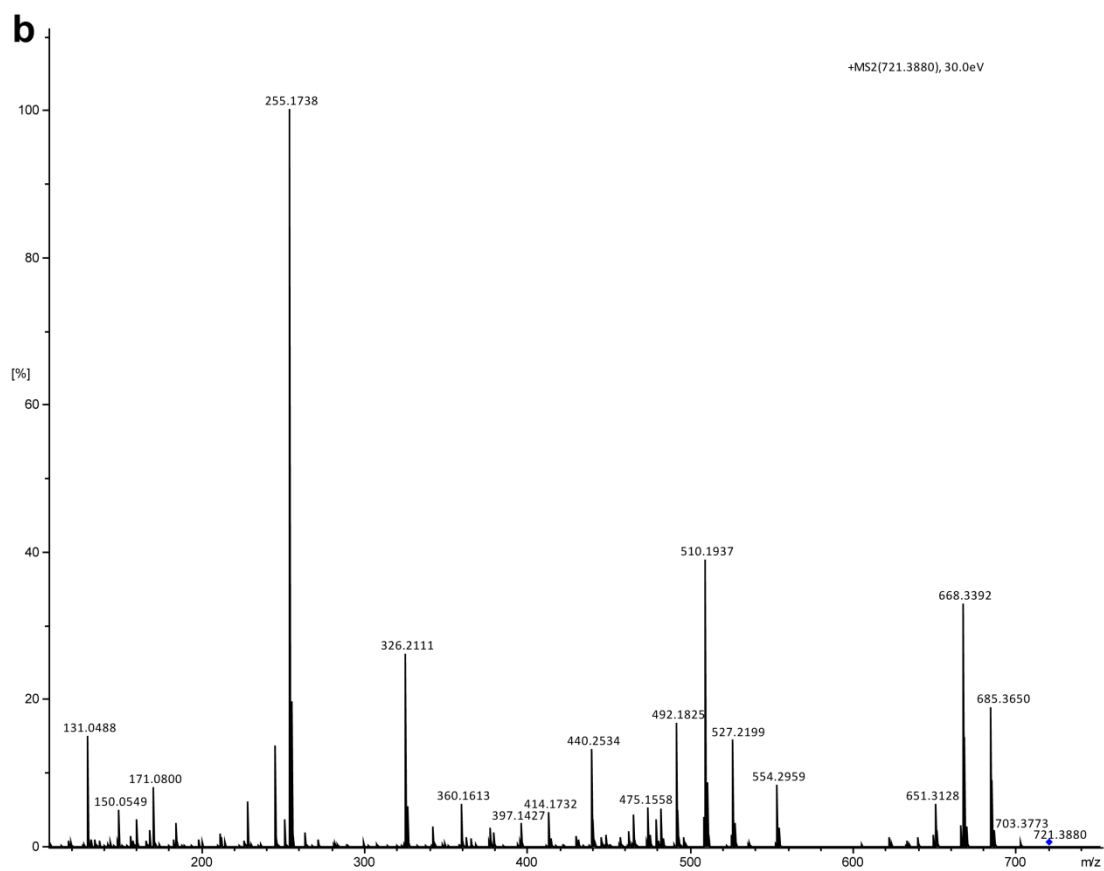

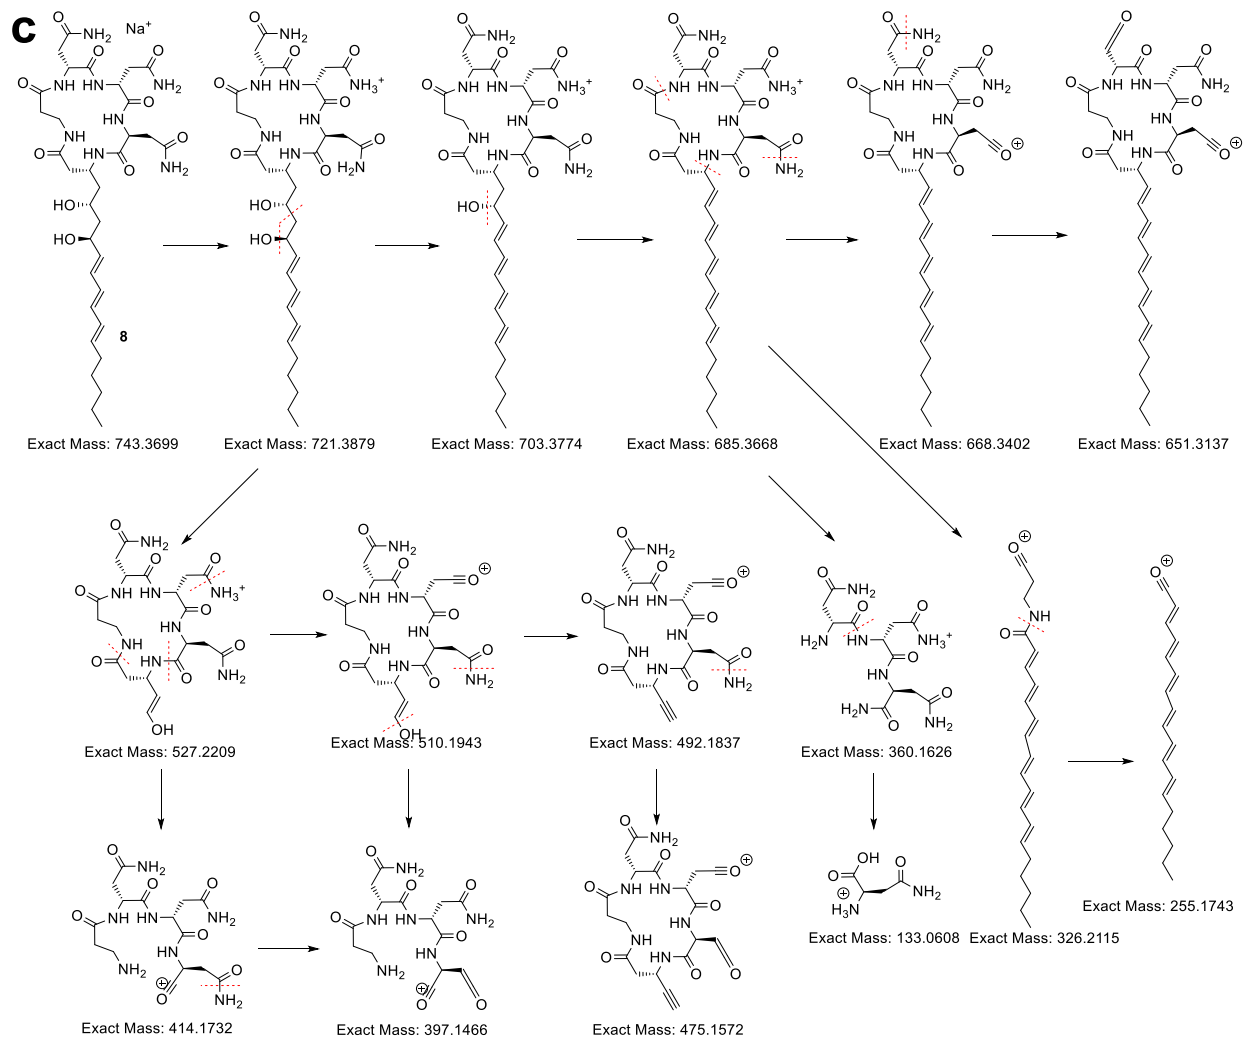

**Supplementary Figure 15. Mass spectrometry analysis of desmethyl-nemamide, 8. a,b** HR-LC-MS/MS of desmethyl-nemamide, 8. **c** Analysis of the fragmentation patterns.

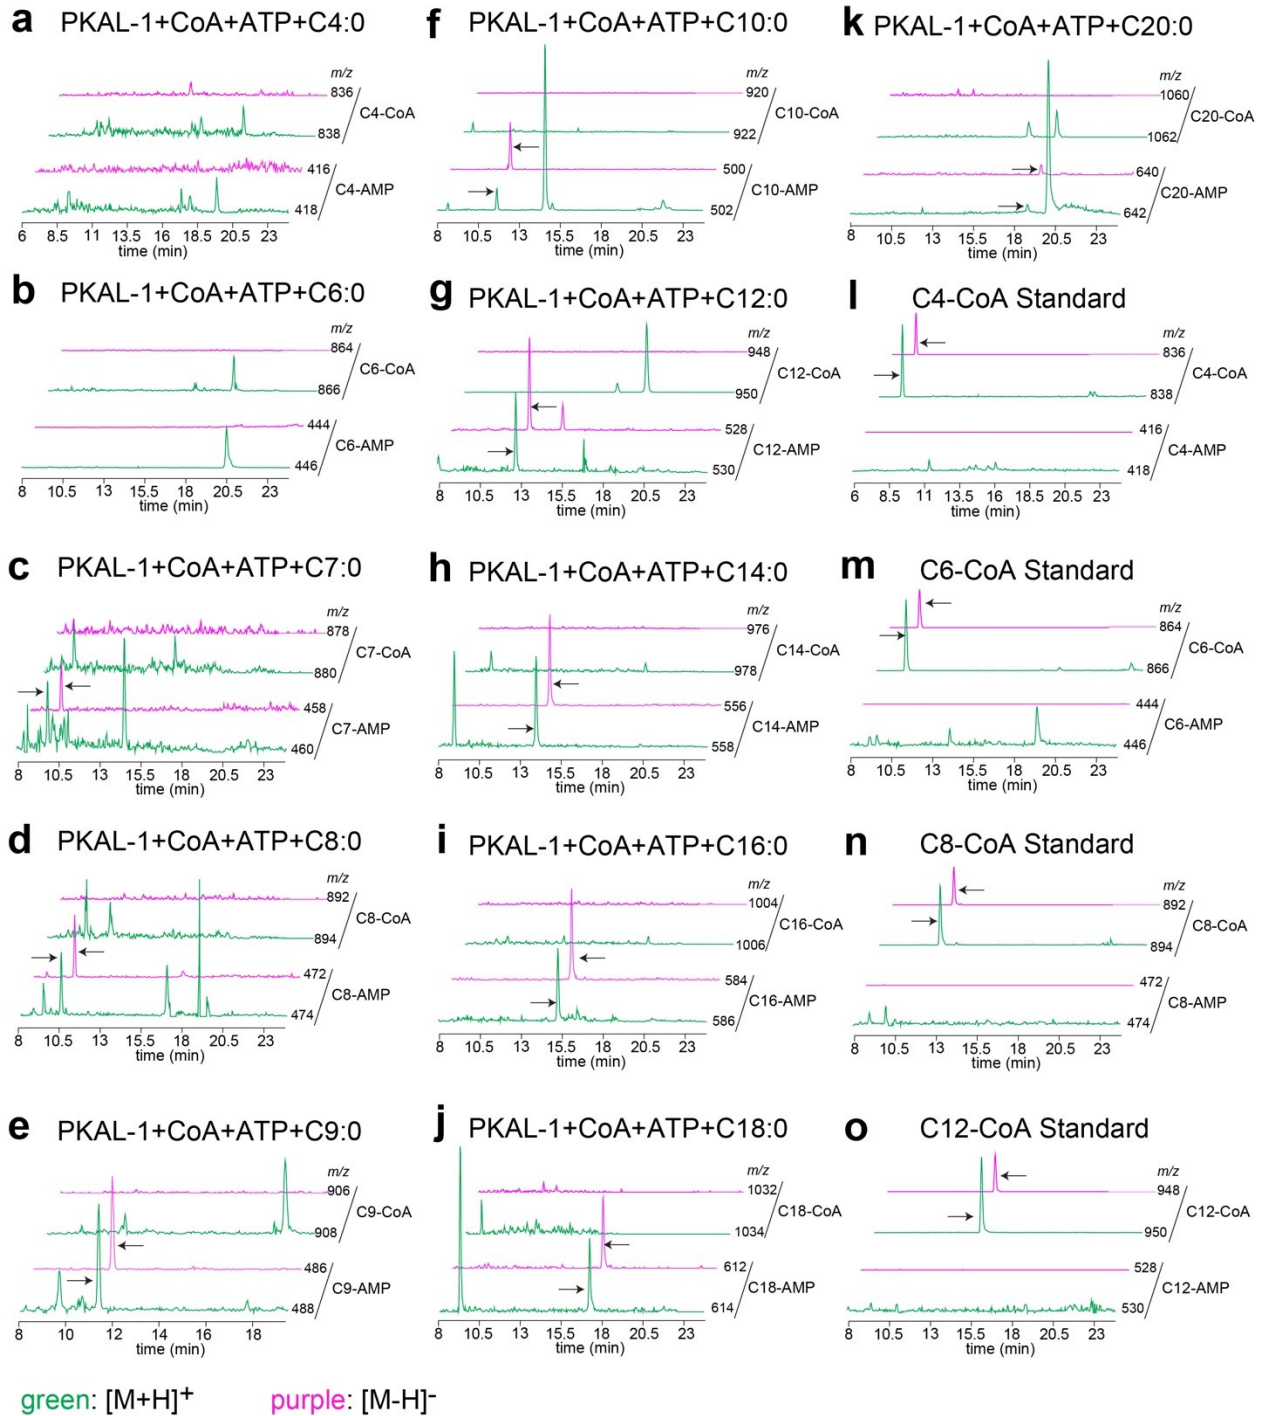

**Supplementary Figure 16. PKAL-1 is not an FACL.** Reaction of PKAL-1 with fatty acids of various lengths, ATP, and CoA did not result in the corresponding fatty acyl-CoAs. Several fatty acyl-CoAs were used as standards.





$\beta 8$   $\alpha 7$   $\beta 9$   $\alpha 8$   $\alpha 9$   
 ecFAAL → 200 210 220 230 240  
 ecFAAL IITHREVMANLRAIS... HDGIKLRPGDRCVSWL... FVYHDMGLVGFLLTPV... ATQL  
 lpFAAL MVSHHNLNDLNKIFTSFHMDET... IIFSWLPHHDMGLIGCILTPI... YGGI  
 FadD32 QITHLNLPTNVQVLNALEGEQEGD... RGVSWLPHHDMGLITVLLASV... LG.H  
 FadD30 VLSHRNVTEVNDQIIRNYFRHEGGAPRLPSSVSWL... PLYHDMGLMVGLFIP... FVGC  
 FadD26 IVSHNTVIANVTSQSMYGYFGDPAKI... PTGTVSWL... PLYHDMGLILGICAPL... VARR  
 mtFAAL VMSHQNVRVNFEQLMSGYFADTDGIPPPNSALVSWL... PLYHDMGLVIGICAPI... LGGY  
 FadD21 MISHRNLQANFQQLMSNYFGRNNGVAPPDPTTIVSWL... PLYHDMGLVIGIAP... LGGY  
 PKAL-1 LLTHRNFLAATYSLK... KFLPDQLLAQSSMKTLAFL... PLYHDMGLVIGIAP... LGGY  
 seFACL LHTTGGYLVYAAT... TFKYVFDYHPGDIYWC... ADVGVVTVGHSYLLYGPLACGA  
 FadD17 KCSHRKVAIA... GV... TITQRFSLGRDDVCYVSM... PLYHDMGLVIGIAP... LGGY  
 FadD15 QLTQSNLVHEIKGA... RAYHPTLLRKGERRLLVFL... PLYHDMGLVIGIAP... LGGY  
 ACSM2A EHSYSSLGLKAKMD... AGWTGLQA... SDIMWT... ISDTGWILNLCSLMPEWALGA  
 ttFACL VYSHRALVLHSLAA... SLVDGTALSEKDVVLPV... PLYHDMGLVIGIAP... LGGY  
 FadD5 VLTHANLTGQAMTA... LYTSGANI... NSDVGFVGV... PLYHDMGLVIGIAP... LGGY  
 asFACL IIPQRAAESRVLFM... STQVGLRHGRHNVVGLM... PLYHDMGLVIGIAP... LGGY  
 FadD7 Pwthaniassv... R... AIITGYRLSPRDATVAVM... PLYHDMGLVIGIAP... LGGY

gate motif 2

$\beta 10$   $\alpha 10$   $\alpha 11$   $\beta 11$   $\alpha 12$   
 ecFAAL → 250 260 270 280  
 ecFAAL SVDYLRTQDFAMRFLQWLKLIK... NRGTVSV... APPFGYEL...  
 lpFAAL QAIHMSPFSFLQNP... LSWLKHITK... YKATISG... SPNFAYDY...  
 FadD32 SFTFMTAAFLVRRPGRWIRELARKPGETGGTFS... APNF...  
 FadD30 PVILTSPEAFIRKPARWMQLLAK... HQAPFSA... APNF...  
 FadD26 RAMLMSPMSPFLRRP... PARWMQLLAT... SGRCFSA... APNF...  
 mtFAAL PAVLTSPVSLQRP... PARWMHLMAS... DFHAFSA... APNF...  
 FadD21 RSELTSPALFLQRP... PARWLHSLAN... GSPSWSA... APNF...  
 PKAL-1 TTYI... MSEF... HPIVMMDLIEK... YEIDTIN... IVPPIANI...  
 seFACL TTLMFEGVFNWPT... PARMCQVVDK... HQVNILY... TAPTAIRA...  
 FadD17 GMSALRRK... SASQFLADVRR... YGATYANYVVGKPLSYVL... ATPE...  
 FadD15 KVTVTGTS... DIKNLLPMLAV... FKPTVVV... SVPRVFEKVYNTAEQNAANAGKGR  
 ACSM2A CTFVHLLPK... DPLVILKTLSS... YPIKSM... GAPIVYRM...  
 ttFACL KQVLPGRRL... DPASLVELFDG... EGVTF... GVPVTVWLA...  
 FadD5 PTVIYPLGAF... DPGLLDVLEA... EKVTGIF... LVPAQWQA...  
 asFACL TYVVVEEFRP... V... DALQLVQQ... EQVTSLF... ATPHTLDA...  
 FadD7 AVSLPARGRF... SAHTFWDDIKA... VGATWYT... AVPTIHIQI...

$\alpha 13$   $\beta 12$   
 ecFAAL → 290 300 310  
 ecFAAL ...CQ.RR... VNEKDLAELDLS... SCWRVAGI... CAEPI...  
 lpFAAL ...CV.KR... IREKKEGLD... LSSWVTF... AFNCAE...  
 FadD32 ...AAVRG... VPRDDEP... PLDLSNVK... GILN... GSEPV...  
 FadD30 ...AV.AK... TSEEDMAG... LLDLGHV... NTIIN... GAEQV...  
 FadD26 ...AV.RR... TSDQDMAG... LLDLDRD... VVGV... IVS...  
 mtFAAL ...AA.RR... TDDDDMAG... RDLGNIL... TILS... GSERV...  
 FadD21 ...AV.RK... TTDADIE... GLDGNV... LGIT... SGAE...  
 PKAL-1 ...FLK.MGI... LQGR... CPSLRT... ILCS... GSSGL...  
 seFACL ...LMA.EGDKA... IEGT... DRSSLR... IRLGS... VEPIN...  
 FadD17 ...LPD.D... ADNPLRA... VYGN... EGV...  
 FadD15 IFATAAQ... TAVDWE... ACD.RGGP... GLLR... AKHAV... FDR... LVY...  
 ACSM2A ...LLQ.QD... L... SSKY... PHLQNC... VTV... GES...  
 ttFACL ...LAD.YL... E... STGHR... LKTLR... RL... LV... GSA...  
 FadD5 ...VCT.EQ... Q... ARPR... DLRLR... VLS... WGA...  
 asFACL ...LAA.AAA... HA... GSSLK... LDSL... RH... VTF...  
 FadD7 ...LLE.RS... ATE... PSGRK... PAAL... RFR... SCS...

$\alpha 14$   $\eta 3$   $\eta 4$   $\beta 13$   $\eta 5$   $\beta 14$   $\beta 15$   $\alpha 15$   
 ecFAAL → 320 330 340 350 360 370  
 ecFAAL AEQLHQFAECFRQVNFNDKTFMPC... YGLAE... NALAVS... FSDEAS... GVV...  
 lpFAAL EETMEHFQAFKEFGFRKEAFYPC... YGLAE... ATLLV... TGG...  
 FadD32 PASMRKFFPAFAFAPYGLKQTA... VPKPS... YGLAE... ATLFV...  
 FadD30 PNTITKFLRRFRFPYINLMPAA... VPKPS... YGLAE... AVV...  
 FadD26 VATVRRFIERFAPYINLSP... TAI... YGLAE... ATLYV...  
 mtFAAL AATIKRFRARFARFNLQ... ERV... YGLAE... ATV...  
 FadD21 PNTLSRFCNRRFAPYIN... FREDMIR... YGLAE... ATLYV...  
 PKAL-1 KDRCKRLLS.IF... PQV... THF... I...  
 seFACL PEAWNEWYWKKIG... KEK... CPV...  
 FadD17 GDIDRFG... R... RFG...  
 FadD15 ARLGHFY... R... GAG...  
 ACSM2A ETLNWR... A... QT...  
 ttFACL RSLARFER... M... GVE...  
 FadD5 DALLRQMSA... T... FET...  
 asFACL DAVLETVHQ... H... LPGE...  
 FadD7 AQAALALQT... E... FAAP...

gate motif 3

insertion motif

$\beta 16$   $\beta 17$   $\beta 18$   $\beta 19$   
 ecFAAL → 380 390 400 410 420  
 ecFAAL APGAE... TRAV... STFV... NC... G... KA... LPE... HGIEIR... NEAG...  
 lpFAAL A.DDNS... P... G... Y... KL... V... SS... GN... P... IQ... EVK...  
 FadD32 V.AADAP... NAVA... QV... SA... K... V... G... V... SE... W...  
 FadD30 S.TFETER... ATR... LIR... Y... HS... DD... KE... P... LL...  
 FadD26 C.GTDGS... V... GTE... L... SY... G... SP... DPS... SVRI...  
 mtFAAL C.AGG... GATS... L... SY... M... LP... RSP... IVRI...  
 FadD21 C.EPK... TGT... P... L... SY... G... MP... TSP... TVRI...  
 PKAL-1 ...HL... SC... G... H... LP... F... ET... K... L... FEH...  
 seFACL ...AIEL... KA... SAT... RP... F... G... V... Q... P... AL...  
 FadD17 ...LDTP... A... G... AL... G... PL... P... GG... IQ...  
 FadD15 ...DLKI... TV... G... K... P... V... P... G... NS... LR...  
 ACSM2A ...KTM... I... K... K... P... Y... M... G... TA... A... S...  
 ttFACL ...KLT... L... K... A... K... T... K... T... P... L... P...  
 FadD5 ...AI... A... K... R... G... S... V... R... V... I... P...  
 asFACL ...TEM... A... P... F... F... S... V... R... I... R...  
 FadD7 ...TET... P... V... V... ST... G... L... V... G... ST...



$\alpha 16$   $\beta 20$   $\beta 21$   
*ecFAAL* 000.....0000.000 440 TT 450 460  
 ecFAAL MSGYFGDQVS.....QDEI.AATGWLDTGD<sup>430</sup>DLGYL.LDGYLYVVTGRI  
 lpFAAL AKGYWNQPEE.TRHAFAGKIKDD.....E.RSAIYLR<sup>440</sup>TGDLGFL.HENELYVVTGRI  
 FadD32 GTGYWGREEE.SAQTFFKNILKSRISESRAEGAP.DDALWVR<sup>450</sup>TGDYGTY.FKDHLYIAGRI  
 FadD30 STGYHNADDALNRDKFQASIREA.....SAGT.PRS<sup>460</sup>PWLR<sup>450</sup>TGDLGFI.VGDEFYIVGRM  
 FadD26 TMGYWQKPKQ.TAQVFDKLVDP.....APAA.PEGP<sup>470</sup>WLR<sup>460</sup>TGDLGVI.SDGE<sup>450</sup>LFIAGRI  
 mtFAAL ANGYWQKPKQ.SERTFFGKIVTP.....SPGT.PEGP<sup>480</sup>WLR<sup>470</sup>TGDSGFV.TDKMFIIGRI  
 FadD21 AEGYWNKPDE.TRHTFGAMLVHP.....SAGT.PDG<sup>490</sup>SWLR<sup>480</sup>TGDLGFL.SEDEMFI<sup>460</sup>GRM  
 PKAL-1 MKAYKNGTP.....NLDEDDWLH<sup>490</sup>TGDIV.TEK<sup>480</sup>GFFYVVDGRM  
 seFACL FGDHERFEQT.....YF.S.TFKNMY<sup>500</sup>FS<sup>490</sup>DGARRDEDGY<sup>480</sup>YVITGRV  
 FadD17 FEGYND<sup>510</sup>EA.....EAER.MAGGVYH<sup>500</sup>SD<sup>490</sup>LAYR<sup>480</sup>DDAGY<sup>470</sup>YFAGRL  
 FadD15 FSYWRNEQA.....TTEA.FTDGWF<sup>510</sup>K<sup>500</sup>TGDLGAVDE<sup>490</sup>GFLTITGRK  
 ACSM2A FSYVDNPK.....TAN.IRGDFW<sup>520</sup>L<sup>510</sup>TGDRGIKDEDGY<sup>500</sup>FQFMGRM  
 ttFACL TGYGNEEA.....TRSALTPD<sup>530</sup>G<sup>520</sup>FFR<sup>510</sup>TGDI<sup>500</sup>AVWDEE<sup>490</sup>GYVEIKDNL  
 FadD5 MSCYWNPEA.....TAEA.FAGGWF<sup>540</sup>HS<sup>530</sup>D<sup>520</sup>LVRMDS<sup>510</sup>DGYVWVDGRM  
 asFACL FVGYLNQPPA.....TAEK.LQDGWY<sup>550</sup>RS<sup>540</sup>D<sup>530</sup>VAVWTP<sup>520</sup>EGTVRILGRV  
 FadD7 VRGYLGDPTT.....TAN.FTDGWL<sup>560</sup>R<sup>550</sup>TGDLGSL<sup>540</sup>SAA<sup>530</sup>G<sup>520</sup>DL<sup>510</sup>SIRGRM

$\beta 22$   $\beta 23$   $\alpha 17$   $\beta 24$   $\beta 25$   
*ecFAAL* TT 470 480 TT 490 TT 500  
 ecFAAL KD<sup>470</sup>LLII.IRGRNIW<sup>480</sup>FDI<sup>490</sup>YIAEQEPEIH.SGDA<sup>500</sup>TAFVTAQEKII.....  
 lpFAAL KD<sup>470</sup>LLII.IYK<sup>480</sup>NHY<sup>490</sup>FDI<sup>500</sup>FSLMHSPLHHVLGKCAAFV<sup>490</sup>IQEEHEY.....  
 FadD32 KD<sup>470</sup>LVI.IDGRNHY<sup>480</sup>FDI<sup>490</sup>CTAQESTKALRVGYAAAFSPANQLPQ<sup>500</sup>TVFDDSHAGLKFDE  
 FadD30 KD<sup>470</sup>LLII.QDGRNHY<sup>480</sup>FDI<sup>490</sup>TTVKEFTG...GRVAAFSVSD<sup>500</sup>DDG.V.....  
 FadD26 KD<sup>470</sup>LLI.VDGRNHY<sup>480</sup>FDI<sup>490</sup>ATI<sup>500</sup>QEITG...GRAAAIAV<sup>490</sup>PDDI.T.....  
 mtFAAL KD<sup>470</sup>LLI.VYGRNHS<sup>480</sup>FDI<sup>490</sup>ATI<sup>500</sup>QEITR...GRCAAISV<sup>490</sup>PGRST.....  
 FadD21 KD<sup>470</sup>MLI.VYGRNHY<sup>480</sup>PEDI<sup>490</sup>STVQEITG...GRVAAISV<sup>500</sup>VPDH.T.....  
 PKAL-1 KD<sup>470</sup>LK.LNGYQVS<sup>480</sup>PTEI<sup>490</sup>ENVIL<sup>500</sup>TLPK...VAEVA<sup>490</sup>VVGIEDEL<sup>500</sup>CG.....  
 seFACL DD<sup>470</sup>VLN.VS<sup>480</sup>CHRLG<sup>490</sup>TAEI<sup>500</sup>TSALVAHPK...IAEAA<sup>490</sup>VVGIPHA<sup>500</sup>IKG.....  
 FadD17 GD<sup>470</sup>WMR.VDGRNLT<sup>480</sup>API<sup>490</sup>ERVLMRY<sup>500</sup>PD...ATEVA<sup>490</sup>VYV<sup>500</sup>PDV<sup>510</sup>PVVG.....  
 FadD15 KE<sup>470</sup>IIVTAG<sup>480</sup>KNVA<sup>490</sup>PAVL<sup>500</sup>DQLRAHPL...ISQAV<sup>510</sup>VVGDA<sup>500</sup>KPF<sup>510</sup>IG.....  
 ACSM2A DD<sup>470</sup>IIN.SS<sup>480</sup>CYRIG<sup>490</sup>PSEV<sup>500</sup>ENALMEHPA...VVETA<sup>510</sup>VISS<sup>500</sup>PDV<sup>510</sup>VRG.....  
 ttFACL KD<sup>470</sup>LK.SGCEWIS<sup>480</sup>V<sup>490</sup>DL<sup>500</sup>ENALMGHPK...VKEA<sup>510</sup>VVA<sup>500</sup>I<sup>510</sup>PH<sup>520</sup>PKWQ.....  
 FadD5 KD<sup>470</sup>MII.SGCE<sup>480</sup>NIY<sup>490</sup>CAEL<sup>500</sup>ENVLASH<sup>510</sup>PD...IAEVA<sup>500</sup>VIGRA<sup>510</sup>DEK<sup>520</sup>WG.....  
 asFACL DD<sup>470</sup>MII.SGCE<sup>480</sup>NIH<sup>490</sup>SEI<sup>500</sup>RVLGTAP<sup>510</sup>G...VTEV<sup>510</sup>VVIG<sup>520</sup>LAD<sup>530</sup>QRWG.....  
 FadD7 KE<sup>470</sup>LIN.RGCE<sup>480</sup>KIS<sup>490</sup>PERV<sup>500</sup>GVLASH<sup>510</sup>PN...VMEA<sup>510</sup>VFGV<sup>520</sup>PH<sup>530</sup>QLYG.....

hinge region

$\alpha 18$   
*ecFAAL* 510 520 530  
 ecFAAL .....LQIQCRIS...D.....E...ERRGQLIHALAAR...IQSEFGV.T  
 lpFAAL .....KLTVMCEVSKNRRFMD.....D...VAQDNLFNEIFEL...VYENHQLEV  
 FadD32 DTSEQLVIVGER...A.....AGTHKLDHQPIVDDIRAA...IAVGHGVTV  
 FadD30 ...EHLVIAAEV<sup>510</sup>RT<sup>520</sup>EHGP...DKVTIMDFSTIKRLV<sup>530</sup>SA...LSKLHGLHV  
 FadD26 ...EQLVAIEF<sup>510</sup>KRRG<sup>520</sup>ST...ABEVM<sup>510</sup>LK<sup>520</sup>LR<sup>530</sup>SV<sup>540</sup>KREV<sup>550</sup>TS...ISKSHSLRV  
 mtFAAL ...EKLVAIEEL<sup>510</sup>KRRG<sup>520</sup>DS...DQDAMARLGA<sup>530</sup>KREV<sup>540</sup>TS...LSSSHGLSV  
 FadD21 ...EKLVTVIE<sup>510</sup>LKLLG<sup>520</sup>DS...AGEAMDEL<sup>530</sup>V<sup>540</sup>IK<sup>550</sup>NV<sup>560</sup>TAA...ISRSHGLNV  
 PKAL-1 ...QLPKAYIVLEKNADE.....LLFLKHLEHTMKEK<sup>570</sup>L...S  
 seFACL ...QAIYAYVTLN<sup>580</sup>HGEEP.....SPELYA.EVRN<sup>590</sup>WVRK...E  
 FadD17 ...DQVMAALV<sup>580</sup>LAPG<sup>590</sup>T<sup>600</sup>TF.....DADKFR<sup>580</sup>AF<sup>590</sup>LTE...QPD  
 FadD15 ...ALITIDPEAFEGW<sup>600</sup>KQRNSKTAGASVGD<sup>610</sup>LAT<sup>620</sup>DPD<sup>630</sup>LIA.EIDA<sup>610</sup>AV<sup>620</sup>KQAN<sup>630</sup>LAV<sup>640</sup>SHAESI  
 ACSM2A ...EVVKAFV...LASQFLSHDPEQLTKELQ<sup>650</sup>QH.VKSV...T  
 ttFACL ...ERPLAVV...PRGEK...TPEELNEHLLKAG...F  
 FadD5 ...EVP<sup>660</sup>IAVAA...VTNDD...RIEDLGE<sup>670</sup>.FLTDR...L  
 asFACL ...QSVTACV...PRLGET...LSADALDT<sup>680</sup>FCRSSE...L  
 FadD7 ...EAVAAVIV...PRESAP...PTREELVQ<sup>690</sup>FCRER...L

$\beta 26$   $\alpha 19$   
*ecFAAL* TT 540 TT 550 TT 560 570  
 ecFAAL AA...IDLPPHSI<sup>540</sup>PR<sup>550</sup>TSS<sup>560</sup>GK<sup>570</sup>PAR<sup>580</sup>AEAKKRYQKAYAASLN<sup>590</sup>VQESLA.....  
 lpFAAL HT...IVLIP<sup>540</sup>LKAM<sup>550</sup>PH<sup>560</sup>TSS<sup>570</sup>GK<sup>580</sup>IR<sup>590</sup>NFCRKHLLDKTLP<sup>600</sup>IVATWQLN<sup>610</sup>KI...EE.....  
 FadD32 RD...VLLVSAG<sup>540</sup>TIP<sup>550</sup>PR<sup>560</sup>TSS<sup>570</sup>GK<sup>580</sup>IR<sup>590</sup>RACRAAYLDGSLRSGV<sup>600</sup>SP<sup>610</sup>TVFA...TS...D...  
 FadD30 TD...FLLVPPGAL<sup>540</sup>PK<sup>550</sup>TSS<sup>560</sup>GK<sup>570</sup>IR<sup>580</sup>AACAKY<sup>590</sup>GANKLQ<sup>600</sup>RVAT<sup>610</sup>FPP.....  
 FadD26 AD...LVLVSPGS<sup>540</sup>IP<sup>550</sup>ITSS<sup>560</sup>GK<sup>570</sup>IR<sup>580</sup>SACVERYS<sup>590</sup>SDG<sup>600</sup>FKRLD<sup>610</sup>VAV.....  
 mtFAAL AD...LVLVAPGS<sup>540</sup>IP<sup>550</sup>ITSS<sup>560</sup>GK<sup>570</sup>VR<sup>580</sup>GACVEQY<sup>590</sup>RQD<sup>600</sup>QFARLDA.....  
 FadD21 AD...LVLVPPGS<sup>540</sup>IP<sup>550</sup>ITSS<sup>560</sup>GK<sup>570</sup>IR<sup>580</sup>AACVEQY<sup>590</sup>RLQ<sup>600</sup>QFTRLDG.....  
 PKAL-1 AVKQLRGGVSI<sup>540</sup>EIKEM<sup>550</sup>PK<sup>560</sup>SSS<sup>570</sup>GK<sup>580</sup>IQ<sup>590</sup>KNRLMY.....  
 seFACL GPLATPDV<sup>540</sup>LHWT<sup>550</sup>SL<sup>560</sup>PK<sup>570</sup>TRS<sup>580</sup>GK<sup>590</sup>IM<sup>600</sup>RILR<sup>610</sup>KIAAG<sup>620</sup>DTSL<sup>630</sup>NGD<sup>640</sup>STLAD<sup>650</sup>PPGV<sup>660</sup>EKLLEEKQA  
 FadD17 GHKQWPSY<sup>540</sup>V<sup>550</sup>RV<sup>560</sup>SAGL<sup>570</sup>PR<sup>580</sup>TMT<sup>590</sup>F<sup>600</sup>KV<sup>610</sup>IK<sup>620</sup>RL<sup>630</sup>SAEG<sup>640</sup>VACAD<sup>650</sup>PV<sup>660</sup>WP...IRR.....  
 FadD15 RKFRILPV<sup>540</sup>DF<sup>550</sup>TE<sup>560</sup>DT<sup>570</sup>GEL<sup>580</sup>T<sup>590</sup>PT<sup>600</sup>M<sup>610</sup>K<sup>620</sup>V<sup>630</sup>K<sup>640</sup>VVAEK<sup>650</sup>FASD<sup>660</sup>IEAIYN...KE.....  
 ACSM2A APYKYPRKIEFV<sup>540</sup>LNL<sup>550</sup>PK<sup>560</sup>TV<sup>570</sup>TG<sup>580</sup>KI<sup>590</sup>Q<sup>600</sup>AKLRDKE.....  
 ttFACL AKWQLPDA<sup>540</sup>YVFAE<sup>550</sup>EIP<sup>560</sup>RT<sup>570</sup>SA<sup>580</sup>GK<sup>590</sup>FL<sup>600</sup>KRALRE<sup>610</sup>QY<sup>620</sup>KNY<sup>630</sup>YGA.....  
 FadD5 ARYKHPKALE<sup>540</sup>IVDAL<sup>550</sup>PR<sup>560</sup>NP<sup>570</sup>PA<sup>580</sup>GK<sup>590</sup>V<sup>600</sup>L<sup>610</sup>KTELRL<sup>620</sup>RYGAC<sup>630</sup>VN<sup>640</sup>VERR...SASAG<sup>650</sup>TERRE.NRQK  
 asFACL ADFKRPKRY<sup>540</sup>FILD<sup>550</sup>QL<sup>560</sup>PK<sup>570</sup>NAL<sup>580</sup>N<sup>590</sup>K<sup>600</sup>VL<sup>610</sup>RQLV<sup>620</sup>QVSS.....  
 FadD7 AA<sup>540</sup>FEIPAS<sup>550</sup>FQ<sup>560</sup>EASGL<sup>570</sup>PH<sup>580</sup>TAK<sup>590</sup>GL<sup>600</sup>DR<sup>610</sup>RAVAER<sup>620</sup>FG<sup>630</sup>HSV.....

highly conserved loop region in C-domain

*ecFAAL* .....  
 lpFAAL .....  
 FadD32 .....  
 FadD30 .....  
 FadD26 .....  
 mtFAAL .....  
 FadD21 .....  
 PKAL-1 .....  
 seFACL IAMPS  
 FadD17 .....  
 FadD15 .....  
 ACSM2A .....  
 ttFACL .....  
 FadD5 L.....  
 asFACL .....  
 FadD7 .....

**Supplementary Figure 17. Sequence alignment of PKAL-1 with FAAL enzymes.** The FAAL enzymes (in green) are ecFAAL from *Escherichia coli*, lpFAAL from *Legionella pneumophila*, mtFAAL from *Mycobacterium tuberculosis*, and FadD21, FadD26, FadD30, and FadD32 from *M. tuberculosis*, and FACL enzymes (in blue), including seFACL from *Salmonella enterica*, ttFACL from *Thermus thermophilus*, asFACL from *Alcaligenes sp.*, ACSM2A from human, and FadD5, FadD7, FadD15, and FadD17 from *M. tuberculosis*. The conserved motifs, including the insertion motif that is present in the FAAL enzymes, but missing in PKAL-1 and FACL enzymes, are indicated.

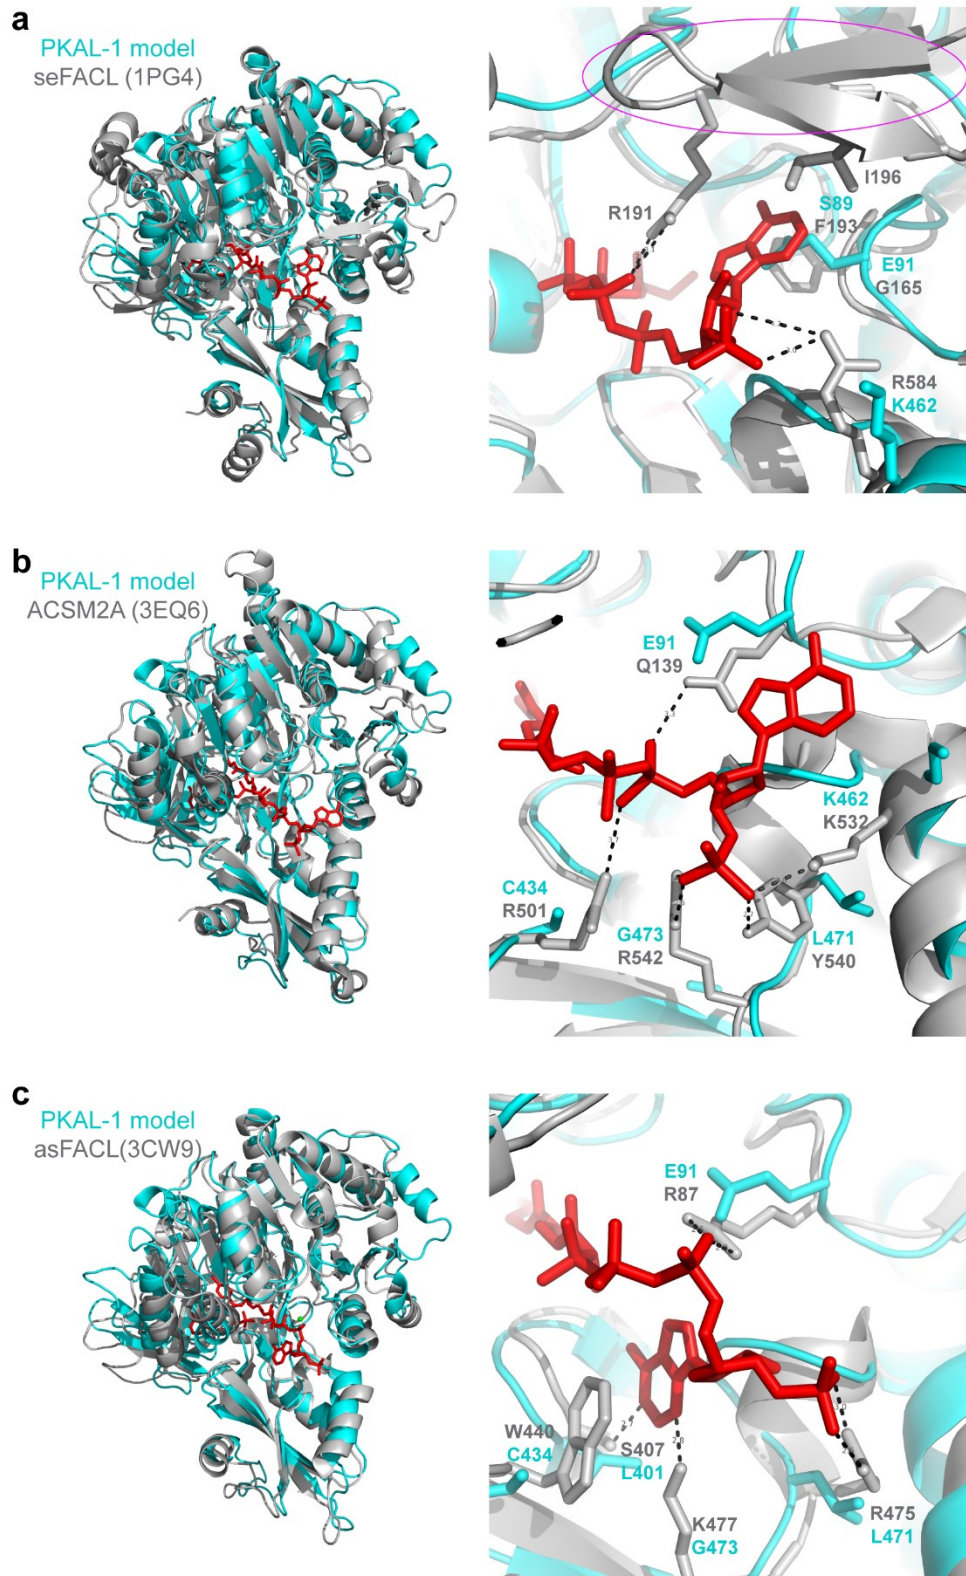

**Supplementary Figure 18. Comparison of the modeled PKAL-1 structure to the structures of FACL enzymes bound to CoA substrates. PKAL-1 was modeled using Phyre2<sup>4</sup>, and six**

templates 5GXD, 6EQO, 6PLJ, 5ES8, 6MFZ, and 5U89 were selected for modeling, enabling 100% of residues to be modeled at >90% confidence. Using Pymol 2.3.3, the PKAL-1 structural model was then overlaid with the structures of three FACL enzymes in the thioester-forming conformation: **(a)** 1PG4, the structure of acetyl-CoA synthetase from *Salmonella enterica* (seFACL), bound to adenosine-5'-propylphosphate and CoA (in red), **(b)** 3EQ6, the structure of the human medium-chain acyl-CoA synthetase (ACSM2A) bound to AMP and butyryl-CoA (in red), and **(c)** 3CW9, the structure of 4-chlorobenzoate:CoA ligase from *Alcaligenes sp.* (asFACL) bound to 4-chlorophenylacyl-CoA (in red). In **(a)**, the seFACL structure has a beta hairpin (circled in pink), which contains R191 that binds CoA and which is missing in the PKAL-1 model. A hydrophobic pocket for the adenine ring of CoA that is formed by I196 in the beta hairpin and F193 and G165 is also missing in the PKAL-1 model. In **(b)**, the ACSM2A structure has several residues, including R501, R542, Y540, and Q139, which are important for binding of the CoA substrate and which are replaced with C434, G473, L471, and E91, respectively, in the PKAL-1 model. In **(c)**, the asFACL structure has several residues, including W440, S407, K477, R475, and R87, which are important for binding of the CoA substrate and which are replaced with C434, L401, G473, L471, and E91, respectively, in the PKAL-1 model.

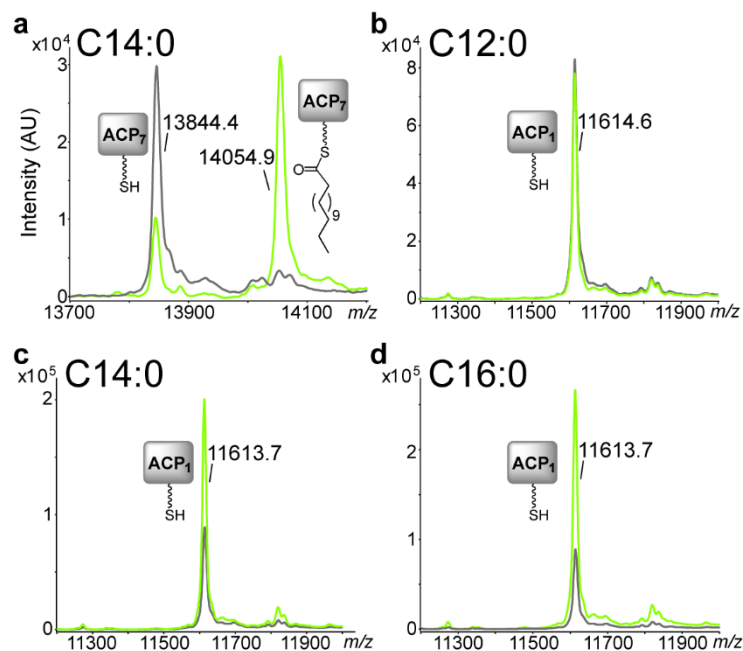

**Supplementary Figure 19. Loading of PKS-1\_ACP<sub>1</sub> or NRPS-1\_ACP<sub>7</sub> by PKAL-1.** To determine the carrier protein specificity of PKAL-1, PKAL-1 was incubated with (a) holo-ACP<sub>7</sub> (positive control), ATP, and C14:0 fatty acid, or with (b-d) holo-ACP<sub>1</sub> from PKS-1, ATP, and C12:0 fatty acid (b), C14:0 fatty acid (c), or C16:0 fatty acid (d). Samples were analyzed by MALDI to determine if the fatty acid substrates were loaded onto the respective carrier proteins.

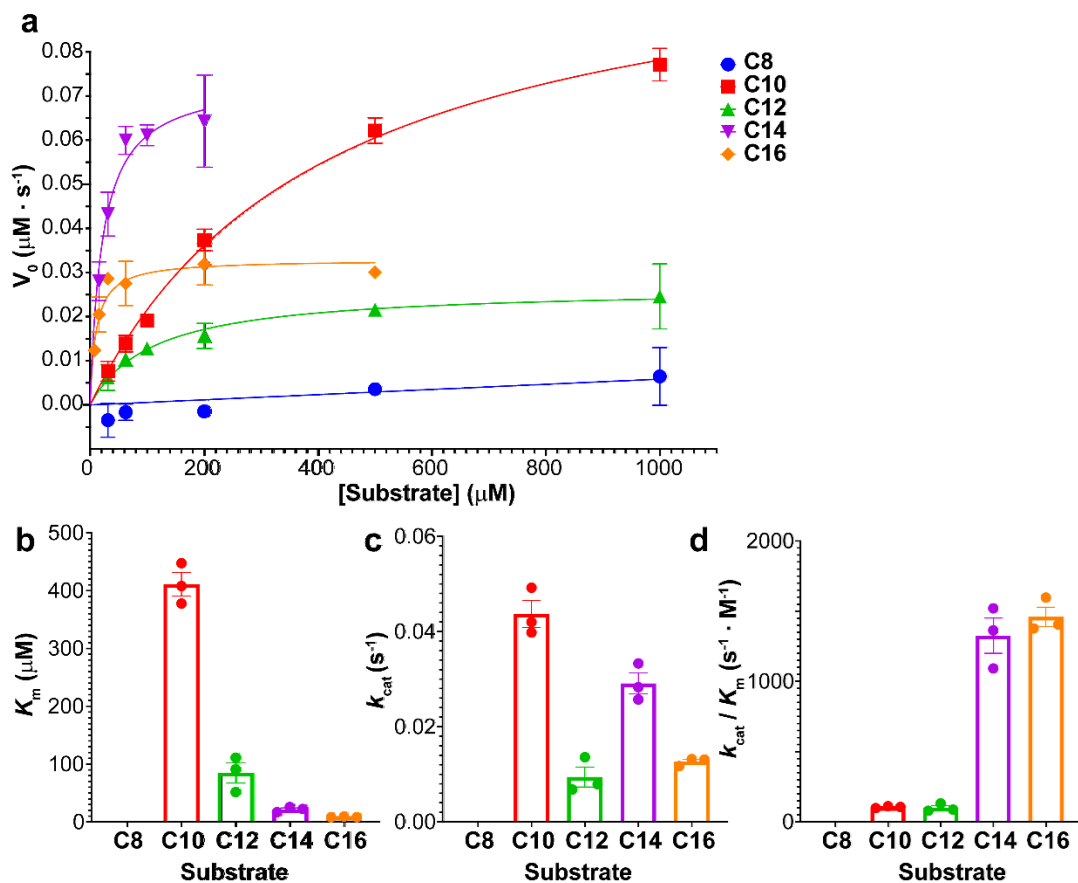

**Supplementary Figure 20. Kinetic data for PKAL-1 against various fatty acid substrates.** **a** PKAL-1 was analyzed in an enzyme-coupled continuous kinetic assay using C8:0, C10:0, C12:0, C14:0, and C16:0 fatty acids as substrates. Kinetic constants, including  $K_m$  (**b**),  $k_{\text{cat}}$  (**c**), and  $k_{\text{cat}} / K_m$  (**d**), were obtained using GraphPad software. Data represent the mean  $\pm$  SEM of three independent experiments. Source data are provided as a Source Data file.



**Supplementary Table 1. A domain selectivity codes for the PKS-1 A<sub>1</sub> domain from various nematode species.**

| Species                 | 235 | 236 | 239 | 278 | 299 | 301 | 322 | 330 | 331 | 517 |
|-------------------------|-----|-----|-----|-----|-----|-----|-----|-----|-----|-----|
| <i>C. elegans</i>       | D   | V   | S   | F   | T   | G   | I   | I   | W   | K   |
| <i>C. angaria</i>       | D   | V   | S   | F   | T   | G   | I   | I   | W   | K   |
| <i>C. japonica</i>      | D   | V   | A   | F   | T   | G   | I   | V   | W   | K   |
| <i>C. brenneri</i>      | D   | V   | S   | F   | T   | G   | I   | I   | W   | K   |
| <i>C. remanei</i>       | D   | V   | S   | F   | T   | G   | I   | V   | W   | K   |
| <i>C. briggsae</i>      | D   | V   | S   | F   | T   | G   | I   | V   | W   | K   |
| <i>C. tropicalis</i>    | D   | V   | S   | F   | T   | G   | I   | I   | W   | K   |
| <i>A. suum</i>          | D   | V   | M   | Y   | F   | G   | I   | I   | W   | K   |
| <i>T. canis</i>         | D   | V   | M   | F   | F   | G   | I   | I   | W   | K   |
| <i>D. immitis</i>       | D   | V   | M   | F   | Y   | G   | I   | I   | W   | K   |
| <i>O. volvulus</i>      | D   | V   | V   | F   | Y   | G   | I   | V   | W   | K   |
| <i>L. loa</i>           | D   | V   | V   | F   | Y   | G   | I   | V   | W   | K   |
| <i>B. malayi</i>        | D   | V   | M   | F   | F   | G   | I   | I   | W   | K   |
| <i>P. pacificus</i>     | D   | V   | F   | F   | I   | G   | I   | I   | W   | K   |
| <i>P. exspectatus</i>   | D   | V   | F   | F   | I   | G   | I   | I   | W   | K   |
| <i>S. carpocapsae</i>   | D   | V   | F   | F   | Y   | G   | I   | I   | W   | K   |
| <i>B. xylophilus</i>    | D   | V   | F   | F   | I   | G   | I   | I   | W   | K   |
| <i>A. ceylanicum</i>    | D   | V   | M   | F   | F   | G   | I   | V   | W   | K   |
| <i>A. duodenale</i>     | D   | V   | M   | F   | L   | G   | I   | I   | W   | K   |
| <i>O. dentatum</i>      | D   | V   | L   | F   | F   | G   | I   | V   | W   | K   |
| <i>N. americanus</i>    | D   | V   | F   | F   | V   | G   | I   | V   | W   | K   |
| <i>H. bacteriophora</i> | D   | V   | V   | F   | F   | G   | I   | V   | W   | K   |
| <i>H. contortus</i>     | D   | V   | F   | F   | F   | G   | I   | V   | W   | K   |

**Supplementary Table 2. Genes with enriched expression (> 5-fold) in the CANs.**

| Enriched genes                                  | Predicted function from WormBase                                                                                                                                                                                    | Initial strain used for screening            | Defective in nemamide production? |
|-------------------------------------------------|---------------------------------------------------------------------------------------------------------------------------------------------------------------------------------------------------------------------|----------------------------------------------|-----------------------------------|
| C24A3.4<br><i>srv-1</i>                         | Predicted to have CoA-transferase activity; homolog of human AMACR (alpha-methylacyl-CoA racemase)<br>Serpentine receptor, class V                                                                                  | VC40591                                      | Yes                               |
| T22F3.12                                        | Predicted to have peptidyl-prolyl cis-trans isomerase activity; ortholog of PPIAL4A (peptidylprolyl isomerase A like 4A); PPIAL4D (peptidylprolyl isomerase A like 4D); and PPIL6 (peptidylprolyl isomerase like 6) |                                              |                                   |
| F49C12.10<br>( <i>nemt-1</i> )<br><i>dhhc-5</i> | Predicted to have methyltransferase activity<br><br>Predicted to have protein-cysteine S-palmitoyltransferase activity; homolog of human ZDHHC21 (zinc finger DHHC-type palmitoyltransferase 21)                    | VC20249                                      | Yes                               |
| <i>cyk-1</i>                                    | Predicted to have Rho GTPase binding activity and actin binding activity                                                                                                                                            |                                              |                                   |
| C32E8.6                                         | Contains AMP-dependent synthetase domain                                                                                                                                                                            | No strain available (RAB60, RAB61 generated) | Yes                               |
| T05A1.5<br><i>pks-1</i>                         | Ortholog of human SLC22A9 (solute carrier family 22 member 9)<br>Polyketide synthase                                                                                                                                | N/A                                          | Yes                               |
| C08G5.6                                         | No homology to known protein domains                                                                                                                                                                                |                                              |                                   |
| C03F11.4                                        | No homology to known protein domains; located in the genome near <i>pks-1</i>                                                                                                                                       | VC40279                                      | No                                |
| ZK112.6                                         | Weak homology to acetyl-CoA synthetase                                                                                                                                                                              |                                              |                                   |
| Y46H3C.7                                        | No homology to known protein domains                                                                                                                                                                                |                                              |                                   |
| C41A3.2                                         | No homology to known protein domains; enriched in coelomocyte, germ line, head mesodermal cell, and sensory neurons; located in the genome near <i>pks-1</i>                                                        |                                              |                                   |
| <i>aexr-1</i>                                   | Predicted to have neuropeptide receptor activity                                                                                                                                                                    |                                              |                                   |
| R04A9.6                                         | No homology to known protein domains; enriched in AVE and hypodermis                                                                                                                                                |                                              |                                   |
| <i>acy-2</i>                                    | Predicted to have adenylate cyclase activity; involved in adenylate cyclase-modulating G protein-coupled receptor signaling pathway and nematode larval development                                                 |                                              |                                   |
| C23H5.11                                        | No homology to known protein domains                                                                                                                                                                                |                                              |                                   |
| F27C8.2                                         | Contains an acyl-CoA N-acyltransferases domain; enriched in GABAergic neurons, body wall muscle cell, excretory cell, and seam cell                                                                                 |                                              |                                   |
| <i>pqn-52</i>                                   | Contains prion-like (Q/N-rich) domain; enriched in cholinergic neurons, coelomocyte, germ line, germline precursor cell, and head mesodermal cell                                                                   |                                              |                                   |

|                                   |                                                                                                                                                                                                |         |     |
|-----------------------------------|------------------------------------------------------------------------------------------------------------------------------------------------------------------------------------------------|---------|-----|
| <i>pak-1</i>                      | Member of P21-activated kinase family; exhibits GTP binding activity and protein kinase activity; involved in hemidesmosome assembly, inductive cell migration, and motor neuron axon guidance |         |     |
| T12G3.4                           | Ortholog of human APMAP (adipocyte plasma membrane-associated protein)                                                                                                                         |         |     |
| Y54E5A.2                          | No homology to known protein domains; enriched in males; involved in spermatogenesis                                                                                                           |         |     |
| <i>nrps-1</i>                     | Nonribosomal peptide synthetase                                                                                                                                                                | N/A     | Yes |
| F27C8.3                           | No homology to known protein domains                                                                                                                                                           |         |     |
| <i>ace-3</i>                      | Exhibits acetylcholinesterase activity; involved in hatching and regulation of backward locomotion; expressed in body wall musculature, neurons, pharyngeal muscle cell, and vulva             |         |     |
| ZK112.5                           | No homology to known protein domains; enriched in coelomocyte, male-specific tissues, and pharynx                                                                                              |         |     |
| F13H8.9                           | Ortholog of human SCLY (selenocysteine lyase)                                                                                                                                                  | RB2336  | No  |
| <i>lips-13</i>                    | Predicted to have lipase activity                                                                                                                                                              |         |     |
| F09C12.6                          | Predicted to have G-protein coupled receptor activity                                                                                                                                          |         |     |
| <i>moc-1</i>                      | Predicted to have molybdopterin adenylyltransferase activity and molybdopterin molybdotransferase activity; expressed in tail; ortholog of human GPHN (gephyrin)                               |         |     |
| F42C5.6                           | Contains SUP-1-like domain; expressed in AVE                                                                                                                                                   |         |     |
| K10C2.12                          | Contains ubiquitin-like domain; expressed in AVG, RIM, and command interneuron                                                                                                                 |         |     |
| <i>acbp-6</i>                     | Predicted to have fatty-acyl-CoA-binding activity                                                                                                                                              |         |     |
| <i>acs-9</i><br>( <i>pkal-1</i> ) | Member of fatty acyl-CoA synthetase family; predicted to have catalytic activity                                                                                                               | VC40189 | Yes |
| <i>swt-1</i>                      | Exhibits sugar transmembrane transporter activity; localizes to golgi and plasma membrane; ortholog of human SLC50A1 (solute carrier family 50 member 1)                                       |         |     |
| Y71H2B.1                          | Predicted to have fatty-acyl-CoA binding activity                                                                                                                                              | VC40597 | Yes |
| F40E3.5                           | Predicted to have protein serine/threonine phosphatase activity                                                                                                                                | VC40998 | No  |

Genes were identified using the dataset of Cao *et al.* and GExplore, applying an enrichment ratio of 5-fold in the CANs and a false detection rate of 0.05.<sup>5,6</sup> Enrichment ratio reflects the ratio of gene expression in the cell type where the gene is most highly expressed versus gene expression in the cell type where the gene is next most highly expressed. Genes were selected for screening for involvement in nemamide production based on the putative enzymatic role of the encoded protein and the availability of a corresponding loss-of-function mutant. C03F11.4 was selected based on its proximity to *pks-1* in the genome.

**Supplementary Table 3. Strains used in this study.**

| Strain  | Genotype                                                                               | Mutation                                             | Background                  | Resource     |
|---------|----------------------------------------------------------------------------------------|------------------------------------------------------|-----------------------------|--------------|
| N2      | wild type                                                                              |                                                      |                             | CGC          |
| VC40591 | C24A3.4( <i>gk961371</i> ) X                                                           | Large deletion                                       |                             | CGC          |
| VC20249 | F49C12.10( <i>gk208727</i> ) IV                                                        | R176Opal                                             |                             | CGC          |
| VC40279 | C03F11.4( <i>gk551362</i> ) X                                                          | R144Opal                                             |                             | CGC          |
| RB2336  | F13H8.9( <i>ok3172</i> ) II                                                            | 754bp deletion with<br>28 bp insertion               |                             | CGC          |
| VC40597 | Y71H2B.1( <i>gk712674</i> ) III                                                        | W136Opal                                             |                             | CGC          |
| VC40998 | F40E3.5( <i>gk930567</i> ) I                                                           | Q47Ochre                                             |                             | CGC          |
| VC40189 | <i>acs-9(gk504580) X</i>                                                               | Q436Amber                                            |                             | CGC          |
| RAB43   | <i>nrps-1(gk186409[C<sub>4</sub>_S1934N]);<br/>gk186410[C<sub>4</sub>_D1971N])</i> III | Located in NRPS-<br>1_C <sub>4</sub>                 | VC20469 (4X<br>outcrossing) | CGC          |
| RAB45   | Y71H2B.1( <i>gk712674</i> ) III                                                        | W136Opal                                             | VC40597(2X<br>outcrossing)  | CGC          |
| RAB51   | <i>nrps-1(reb8[ACP<sub>7</sub>_S307V])</i> III                                         | NRPS-1_ACP <sub>7</sub>                              | N2                          | CRISPR-Cas9  |
| RAB52   | <i>pks-1(reb9[C<sub>1</sub>_H6685A])</i> X                                             | PKS-1_C <sub>1</sub>                                 | N2                          | CRISPR-Cas9  |
| RAB53   | <i>nrps-1(reb10[C<sub>3</sub>_H1486A])</i> III                                         | NRPS-1_C <sub>3</sub>                                | N2                          | CRISPR-Cas9  |
| RAB54   | <i>pks-1(reb11[TE<sub>1</sub>_S7593A])</i> X                                           | PKS-1_TE <sub>1</sub>                                | N2                          | CRISPR-Cas9  |
| RAB55   | <i>nrps-1(reb12[TE<sub>2</sub>_S2803A])</i> III                                        | NRPS-1_TE <sub>2</sub>                               | N2                          | CRISPR-Cas9  |
| RAB56   | <i>pks-1(reb13[TE<sub>1</sub>_S7593C];<br/>reb14[TE<sub>1</sub>_G7596A])</i> X         | PKS-1_TE <sub>1</sub>                                | N2                          | CRISPR-Cas9  |
| RAB57   | <i>nemt-1(reb15)</i> IV                                                                | 306 bp deletion with<br>27 bp insertion              | N2                          | CRISPR-Cas9  |
| RAB58   | <i>pkal-1(reb21)</i> X                                                                 | 154 bp deletion with<br>single base 'T'<br>insertion | N2                          | CRISPR-Cas9  |
| RAB59   | <i>pkal-1(reb28)</i> X                                                                 | 552 bp deletion                                      | N2                          | CRISPR-Cas9  |
| RAB60   | C32E8.6( <i>reb23</i> ) I                                                              | 991 bp deletion with<br>10 bp insertion              | N2                          | CRISPR-Cas9  |
| RAB61   | C32E8.6( <i>reb24</i> ) I                                                              | 993 bp deletion                                      | N2                          | CRISPR-Cas9  |
| RAB62   | C24A3.4( <i>reb16</i> ) X                                                              | 1361 bp deletion                                     | N2                          | CRISPR-Cas9  |
| RAB67   | <i>pkal-1(reb28); pks-<br/>1(reb11[TE<sub>1</sub>_S7593A])</i>                         |                                                      |                             | Outcrossing  |
| RAB68   | <i>pkal-1(reb28); nemt-1(reb15)</i>                                                    |                                                      |                             | Outcrossing  |
| RAB69   | <i>nemt-1(reb15); pks-1(reb11[TE<sub>1</sub>-<br/>S7593A])</i>                         |                                                      |                             | Outcrossing  |
| RAB72   | <i>rebEx15 (Pnemt-1::gfp, 50 ng/μL;<br/>CAN::mcherry, 50 ng/μL)</i>                    |                                                      | N2                          | Transgenesis |
| RAB73   | <i>rebEx16 (Ppkal-1::gfp, 50 ng/μL;<br/>CAN::mcherry, 50 ng/μL)</i>                    |                                                      | N2                          | Transgenesis |
| RAB74   | <i>rebEx17 (PC32E8.6::gfp, 50 ng/μL;<br/>CAN::mcherry, 50 ng/μL)</i>                   |                                                      | N2                          | Transgenesis |

|        |                                                                                 |                        |    |  |              |
|--------|---------------------------------------------------------------------------------|------------------------|----|--|--------------|
| RAB76  | <i>nemt-1(reb15); rebEx19(Pnemt-1::nemt-1::sl2::mcherry, 50 ng/μL)</i>          |                        |    |  | Transgenesis |
| RAB77  | <i>pkal-1(reb28); rebEx20(Ppkal-1::pkal-1::sl2::mcherry, 50 ng/μL)</i>          |                        |    |  | Transgenesis |
| RAB78  | <i>C32E8.6(reb24); rebEx21(PC32E8.6::C32E8.6::sl2::mcherry, 50 ng/μL)</i>       |                        |    |  | Transgenesis |
| RAB79  | <i>C32E8.6(reb24); rebEx20(Ppkal-1::pkal-1::sl2::mcherry, 50 ng/μL)</i>         |                        |    |  | Transgenesis |
| RAB80  | <i>pkal-1(reb28); rebEx21(PC32E8.6::C32E8.6::sl2::mcherry, 50 ng/μL)</i>        |                        |    |  | Transgenesis |
| RAB81  | <i>Y71H2B.1(gk712674); rebEx22(PY71H2B.1::Y71H2B.1::sl2::mcherry, 50 ng/μL)</i> |                        |    |  | Transgenesis |
| RAB82  | <i>C24A3.4(reb16); rebEx23(PC24A3.4::C24A3.4::sl2::mcherry, 50 ng/μL)</i>       |                        |    |  | Transgenesis |
| RAB89  | <i>pks-1(reb22[A<sub>1</sub>_G7106E]) X</i>                                     | PKS-1_A <sub>1</sub>   | N2 |  | CRISPR-Cas9  |
| RAB103 | <i>pks-1(reb29[PCP<sub>2</sub>_S7463A]) X</i>                                   | PKS-1_PCP <sub>2</sub> | N2 |  | CRISPR-Cas9  |
| RAB109 | <i>nrps-1(reb31[A<sub>3</sub>_G2337D]) III</i>                                  | NRPS-1_A <sub>3</sub>  | N2 |  | CRISPR-Cas9  |
| RAB110 | <i>nrps-1(reb32[A<sub>2</sub>_G964D]) III</i>                                   | NRPS-1_A <sub>2</sub>  | N2 |  | CRISPR-Cas9  |

**Supplementary Table 4. Single worm PCR primers for mutant strains in this study.**

| Strain | Genotype                                                                                                               | Sequence                                                                   |
|--------|------------------------------------------------------------------------------------------------------------------------|----------------------------------------------------------------------------|
| RAB43  | <i>nrps-1</i> ( <i>gk186409</i> [ <i>C<sub>4</sub>S1934N</i> ];<br><i>gk186410</i> [ <i>C<sub>4</sub>D1971N</i> ]) III | Forward: CTGAAGCCTTTATTTCAGTGCCAAG<br>Reverse: CTTGCACTGCTAGAGCTAAGCTTC    |
| RAB45  | Y71H2B.1( <i>gk712674</i> ) III                                                                                        | Forward: GGAAAGCACGGAGATTTTGAAG<br>Reverse: AGTGATGGGAATGGTCTCTGTT         |
| RAB51  | <i>nrps-1</i> ( <i>reb8</i> [ <i>ACP<sub>7</sub>S307V</i> ]) III                                                       | Forward: GAAGGAGCAGCAAACATCGAGAA<br>Reverse: ATCTGAGTGACCTGCTTTCAGAG       |
| RAB52  | <i>pks-1</i> ( <i>reb9</i> [ <i>C<sub>1</sub>H6685A</i> ]) X                                                           | Forward: CATCTGTAAACCCTGCAGATATTGC<br>Reverse: CGGCATCGCAGAAAACCTGATAATGC  |
| RAB53  | <i>nrps-1</i> ( <i>reb10</i> [ <i>C<sub>3</sub>H1486A</i> ]) III                                                       | Forward: GAAGCTGGTGGAGTTGTCCAATGCT<br>Reverse: GAAACTGTATCCCAGTTCTCTGGAG   |
| RAB54  | <i>pks-1</i> ( <i>reb11</i> [ <i>TE<sub>1</sub>S7593A</i> ]) X                                                         | Forward: GGTGATTAATCTGGAGTAC<br>Reverse: TAGTCCAGAGAAGACGTACT              |
| RAB55  | <i>nrps-1</i> ( <i>reb12</i> [ <i>TE<sub>2</sub>S2803A</i> ]) III                                                      | Forward: TCGAGACCAAACCTCGGAATC<br>Reverse: TCTGAGAAAATGTTCCACCGG           |
| RAB56  | <i>pks-1</i> ( <i>reb13</i> [ <i>TE<sub>1</sub>S7593C</i> ];<br><i>reb14</i> [ <i>TE<sub>1</sub>G7596A</i> ]) X        | Forward: GAGGTGATTAATCTGGAGTACGGC<br>Reverse: TCACTATCCGGTAGTCCAGAGAAG     |
| RAB57  | <i>nemt-1</i> ( <i>reb15</i> ) IV                                                                                      | Forward: AGTGGCTTTGCCTTTCCTCCTT<br>Reverse: AGCCCTCAACTACTTCATCAGTG        |
| RAB58  | <i>pkal-1</i> ( <i>reb21</i> ) X                                                                                       | Forward: GAGCTCGGGATTTCTCAAGGT<br>Reverse: CAATTCTGCAACACAGAATGTCG         |
| RAB59  | <i>pkal-1</i> ( <i>reb28</i> ) X                                                                                       | Forward: GAGCTCGGGATTTCTCAAGGT<br>Reverse: CAATTCTGCAACACAGAATGTCG         |
| RAB60  | <i>C32E8.6</i> ( <i>reb23</i> ) I                                                                                      | Forward: GCTTCAACTCCAGAGAATCAGG<br>Reverse: CAACGGCTCTCCGCTCTTAAG          |
| RAB61  | <i>C32E8.6</i> ( <i>reb24</i> ) I                                                                                      | Forward: GCTTCAACTCCAGAGAATCAGG<br>Reverse: CAACGGCTCTCCGCTCTTAAG          |
| RAB62  | <i>C24A3.4</i> ( <i>reb16</i> ) X                                                                                      | Forward: CTCTGCCGTACCAGTGATGTTCTA<br>Reverse: CTATCCATGTGCTACCAAACCTTGTC   |
| RAB89  | <i>pks-1</i> ( <i>reb22</i> [ <i>A<sub>1</sub>G7106E</i> ]) X                                                          | Forward: CACCACTATACCAATTCGAAGAAGCTG<br>Reverse: AGTGACTTGTCAACTTTCCCACTTG |
| RAB103 | <i>pks-1</i> ( <i>reb29</i> [ <i>PCP<sub>2</sub>S7463A</i> ]) X                                                        | Forward: GAGACTCACTGAGCAATGAAACTTG<br>Reverse: TCCAGATTTAATCACCTCTTCAGC    |
| RAB109 | <i>nrps-1</i> ( <i>reb31</i> [ <i>A<sub>3</sub>G2337D</i> ]) III                                                       | Forward: CTACCAGCAATTCTTTACTGCTAATTC<br>Reverse: CTTCTCAATTCTACAGACATCTCCA |
| RAB110 | <i>nrps-1</i> ( <i>reb32</i> [ <i>A<sub>2</sub>G964D</i> ]) III                                                        | Forward: CCGTATCTCAAATCATAGGCC<br>Reverse: CCTATGTCCTCGCACCTTCACCTG        |

**Supplementary Table 5. Single-worm PCR information used to confirm genotype of wild-type and mutant worm strains used in this study.**

| Strain | Genotype                                                                                                                    | Wild type | Mutant  | Enzyme digestion                                                                               |
|--------|-----------------------------------------------------------------------------------------------------------------------------|-----------|---------|------------------------------------------------------------------------------------------------|
| RAB43  | <i>nrps-1</i><br>( <i>gk186409</i> [ <i>C<sub>4</sub>_S1934N</i> ];<br><i>gk186410</i> [ <i>C<sub>4</sub>_D1971N</i> ]) III | 445 bp    | 445 bp  | Wild type is cut by BtsIMutI to 265bp + 180bp; no cut for mutant                               |
| RAB45  | Y71H2B.1( <i>gk712674</i> ) III                                                                                             | 700 bp    | 700 bp  | Wild type is cut by HinfI into 450bp + 200bp + 50bp; mutant is cut by HinfI into 500bp + 200bp |
| RAB51  | <i>nrps-1</i> ( <i>reb8</i> [ <i>ACP<sub>7</sub>_S307V</i> ]) III                                                           | 820 bp    | 820 bp  | Mutant is cut by AatII into 438bp + 382bp                                                      |
| RAB52  | <i>pks-1</i> ( <i>reb9</i> [ <i>C<sub>1</sub>_H6685A</i> ]) X                                                               | 1098 bp   | 1098 bp | Mutant is cut by SphI into 750bp + 348bp                                                       |
| RAB53  | <i>nrps-1</i> ( <i>reb10</i> [ <i>C<sub>3</sub>_HI486A</i> ]) III                                                           | 993 bp    | 993 bp  | Mutant is cut by AseI into 658bp + 335bp                                                       |
| RAB54  | <i>pks-1</i> ( <i>reb11</i> [ <i>TE<sub>1</sub>_S7593A</i> ]) X                                                             | 562 bp    | 562 bp  | Mutant is cut by SphI into 355bp + 207bp                                                       |
| RAB55  | <i>nrps-1</i> ( <i>reb12</i> [ <i>TE<sub>2</sub>_S2803A</i> ]) III                                                          | 539 bp    | 539 bp  | Mutant is cut by NheI into 318bp + 221bp                                                       |
| RAB56  | <i>pks-1</i> ( <i>reb13</i> [ <i>TE<sub>1</sub>_S7593C</i> ];<br><i>reb14</i> [ <i>TE<sub>1</sub>_G7596A</i> ]) X           | 574 bp    | 574 bp  | Mutant is cut by KasI into 364bp + 210bp                                                       |
| RAB57  | <i>nemt-1</i> ( <i>reb15</i> ) IV                                                                                           | 981 bp    | 702 bp  |                                                                                                |
| RAB58  | <i>pkal-1</i> ( <i>reb21</i> ) X                                                                                            | 1723 bp   | 1570 bp |                                                                                                |
| RAB59  | <i>pkal-1</i> ( <i>reb28</i> ) X                                                                                            | 1723 bp   | 1171 bp |                                                                                                |
| RAB60  | <i>C32E8.6</i> ( <i>reb23</i> ) I                                                                                           | 1405 bp   | 424 bp  |                                                                                                |
| RAB61  | <i>C32E8.6</i> ( <i>reb24</i> ) I                                                                                           | 1405 bp   | 412 bp  |                                                                                                |
| RAB62  | <i>C24A3.4</i> ( <i>reb16</i> ) X                                                                                           | 1863 bp   | 502 bp  |                                                                                                |
| RAB89  | <i>pks-1</i> ( <i>reb22</i> [ <i>A<sub>1</sub>_G7106E</i> ]) X                                                              | 1350 bp   | 1350 bp | Mutant is cut by Sall into 914bp + 436bp                                                       |
| RAB103 | <i>pks-1</i> ( <i>reb29</i> [ <i>PCP<sub>2</sub>_S7463A</i> ]) X                                                            | 1057bp    | 1057bp  | Mutant is cut by Sall into 914bp + 436bp                                                       |
| RAB109 | <i>nrps-1</i> ( <i>reb31</i> [ <i>A<sub>3</sub>_G2337D</i> ]) III                                                           | 1009bp    | 1009bp  | Wild type cut by BspEI to 395bp + 614bp (mutant not cut)                                       |
| RAB110 | <i>nrps-1</i> ( <i>reb32</i> [ <i>A<sub>2</sub>_G964D</i> ]) III                                                            | 1062bp    | 1062bp  | Mutant cut by Sall to 380bp + 682bp                                                            |

**Supplementary Table 6. gRNA sequences used for CRISPR-Cas9 in this study.**

| Strain | Genotype (alleles)                                                         | DNA encoding sgRNA (20 bases+NGG, and vector for cloning) or crRNA                                                                         |
|--------|----------------------------------------------------------------------------|--------------------------------------------------------------------------------------------------------------------------------------------|
| RAB51  | <i>nrps-1(reb8[ACP<sub>7</sub>_S307V])</i> III                             | CTCCAGCTCGGCGAGTCTTA <u>AGG</u> (pTM55-FE*)                                                                                                |
| RAB52  | <i>pks-1(reb9[C<sub>1</sub>_H6685A])</i> X                                 | ATCATATTTTAACTGATGGT <u>TGG</u> (pTM55-FE*)                                                                                                |
| RAB53  | <i>nrps-1(reb10[C<sub>3</sub>_H1486A])</i> III                             | GGCTTCTACCATCGCAGATC <u>AGG</u> (pTM55-FE*)                                                                                                |
| RAB54  | <i>pks-1(reb11[TE<sub>1</sub>_S7593A])</i> X                               | TTCGTTATGGGGCACTCGAT <u>GGG</u> (pTM55)<br>CTTCGTTATGGGGCACTCGA <u>TGG</u> (pTM55)<br>GTTATGGGGCACTCGATGGG <u>TGG</u> (pTM55)              |
| RAB55  | <i>nrps-1(reb12[TE<sub>2</sub>_S2803A])</i> III                            | ACCTCTAAATTGGTGTTCAT <u>TGG</u> (pTM55)<br>TTCATTGGCGCCTCGTCTGC <u>TGG</u> (pTM55)                                                         |
| RAB56  | <i>pks-1(reb13[TE<sub>1</sub>_S7593C]; reb14[TE<sub>1</sub>_G7596A])</i> X | TTCGTTATGGGGCACTCGAT <u>GGG</u> (pTM55)<br>CTTCGTTATGGGGCACTCGA <u>TGG</u> (pTM55)<br>GTTATGGGGCACTCGATGGG <u>TGG</u> (pTM55)              |
| RAB57  | <i>nemt-1(reb15)</i> IV                                                    | TATTACTACAGTTATGGCTT <u>TGG</u> (pTM55-FE*)<br>CGAGAAATATGGAACACAGG <u>TGG</u> (pTM55-FE*)                                                 |
| RAB58  | <i>pkal-1(reb21)</i> X                                                     | AAACTATTGGGCACTTTCGG <u>AGG</u> (pTM55-FE*)<br>CCCAGAATCCAGATGCATGG <u>TGG</u> (pTM55-FE*)<br>TCTTGTTGGACATATTCTGCC <u>AGG</u> (pTM55-FE*) |
| RAB59  | <i>pkal-1(reb28)</i> X                                                     | AAACTATTGGGCACTTTCGG <u>AGG</u> (pTM55-FE*)<br>CCCAGAATCCAGATGCATGG <u>TGG</u> (pTM55-FE*)<br>TCTTGTTGGACATATTCTGCC <u>AGG</u> (pTM55-FE*) |
| RAB60  | C32E8.6( <i>reb23</i> ) I                                                  | CTTCCATTCTTCCATGCGGG <u>TGG</u> (pTM55-FE*)<br>GACGTGATCCGGAAAGTGGA <u>GGG</u> (pTM55-FE*)                                                 |
| RAB61  | C32E8.6( <i>reb24</i> ) I                                                  | CTTCCATTCTTCCATGCGGG <u>TGG</u> (pTM55-FE*)<br>GACGTGATCCGGAAAGTGGA <u>GGG</u> (pTM55-FE*)                                                 |
| RAB89  | <i>pks-1(reb22[A<sub>1</sub>_G7106E])</i> X                                | AGGGACACCTGTTGAGCCAC <u>TGG</u> (pTM55-FE*)                                                                                                |
| RAB103 | <i>pks-1(reb29[PCP<sub>2</sub>_S7463A])</i> X                              | AGCAATTTGAATAGCATTGA <u>GGG</u> (pTM55-FE*)                                                                                                |
| RAB109 | <i>nrps-1(reb31[A<sub>3</sub>_G2337D])</i> III                             | rCrUrUrCrGrGrUrGrUrArCrCrCrGrUrUrGrUrUrC<br>rGrUrUrUrUrArGrArGrCrUrArUrGrCrU                                                               |
| RAB110 | <i>nrps-1(reb32[A<sub>2</sub>_G964D])</i> III                              | rGrCrUrUrArCrGrUrCrArCrCrUrCrArArCrArUrC<br>rGrUrUrUrUrArGrArGrCrUrArUrGrCrU                                                               |

\* pTM55-FE is a modified version of pTM55 (a gift of Patrick McGrath) and was mutated to enable a higher level of recognition efficiency<sup>7</sup> by Cas9.



**Supplementary Table 7. Repair templates used for CRISPR-Cas9 in this study.**

| Strain | Genotype (alleles)                                                                              | Repair template*                                                                                                                                                                                                |
|--------|-------------------------------------------------------------------------------------------------|-----------------------------------------------------------------------------------------------------------------------------------------------------------------------------------------------------------------|
| RAB51  | <i>nrps-</i><br><i>1(reb8[ACP<sub>7</sub>_S307V])</i><br>III                                    | ATGAAGTTGAAACCACTCCTCTACCATACCTCGGAATCG<br><u>ACGTC</u> TTAAGACTCGCCGAGCTGGAGTACCACGTGGCT<br>AGT (underlined: AatII; S307V: TCC» <b>GTC</b> )                                                                   |
| RAB52  | <i>pks-</i><br><i>1(reb9[C<sub>1</sub>_H6685A])</i> X                                           | TGATAACAGTCGAATTCACATCGTTTTCAATCAGCAT <b>GC</b><br><b>A</b> ATTTTAACTGATGGTTGGTCAATGACTGTTCTTTCTGA<br>CACTGT (underlined: SphI; H6685A: CAT» <b>GCA</b> )                                                       |
| RAB53  | <i>nrps-</i><br><i>1(reb10[C<sub>3</sub>_H1486A])</i><br>III                                    | CTGGATGAGTAGCAAAAATAAGTTATTGACAATTTCCATT<br>CAC <b>GC</b> ATTAATCTGCGATGGTAGAAGCCTGCAGATTCTC<br>GAG (underlined: AseI; H1486A: CAC» <b>GCA</b> )                                                                |
| RAB54  | <i>pks-</i><br><i>1(reb11[TE<sub>1</sub>_S7593A])</i><br>X                                      | TGCCGCACATGCCGAAACAAGAGAATCTTCGTTATGGG<br><u>GCAT<b>GCG</b></u> ATGGGTGGAATAATGAGTCGCGAAATAGTGGC<br>TGAGCTCAAAT (underlined: SphI; S7593A: TCG» <b>GCG</b> )                                                    |
| RAB55  | <i>nrps-</i><br><i>1(reb12[TE<sub>2</sub>_S2803A])</i><br>III                                   | GTGCTGAAAATATTGAAACCTCTAAATTGGTGTTTATTGG<br>CGCC <b>GCT</b> AGCGCTGGTACTTTTGCATTTTCCACGTCACA<br>ACTTTTTG (underlined: NheI; S2803A: TCG» <b>GCT</b> )                                                           |
| RAB56  | <i>pks-</i><br><i>1(reb13[TE<sub>1</sub>_S7593C];</i><br><i>reb14[TE<sub>1</sub>_G7596A])</i> X | TGCCGCACATGCCGAAACAAGAGAATCTTCGTTATGGG<br>ACAT <b>TGC</b> ATGG <b>GCGCC</b> ATAATGAGTCGCGAAATAGTGGC<br>TGAGCTCAAAT (underlined: KasI; S7593C/G7596A: TCG»<br><b>TGC/</b> GGA» <b>GCC</b> )                      |
| RAB89  | <i>pks-</i><br><i>1(reb22[A<sub>1</sub>_G7106E])</i> X                                          | AGAACTCAATTTGGAAGTATTTACTCCATATTCACCAGT <b>GA</b><br><b>GTCGAC</b> AGGTGTCCCTAAAGGAGTTTTGATGGCGGAACA<br>GTCA(underlined: SallI; G7106E: GGC» <b>GAG</b> )                                                       |
| RAB103 | <i>pks-</i><br><i>1(reb29[PCP<sub>2</sub>_S7463A])</i><br>X                                     | GTGGCGCCGACAGATAAATTTGAAAGTATTGGTGGAA <b>ACG</b><br><b>CGTT</b> AAATGCTATTCAAATTGCTCATCGTTGGCTGAAG<br>AG(underlined: MluI; S7463A: TCC» <b>GCG</b> )                                                            |
| RAB109 | <i>nrps-1(reb31[A<sub>3</sub>_</i><br><i>G2337D])</i> III                                       | CACCGACTATTGTCTCTCTACATTATCACA <b>ACTAGTGATAC</b><br><b>TACTGGTACACCGAAGTCGGTAGCAATCGGAGCGAAATC</b><br>(bold: changed for crRNA binding purposes; underlined: previous<br>BspEI site; G2337D; GGA» <b>GAT</b> ) |
| RAB110 | <i>nrps-1(reb32[A<sub>2</sub>_</i><br><i>G964D])</i> III                                        | CAACAAATCCATCCTATACGACCTAGCTTACGTCAC <b>GTC</b><br><b>GACAAGTGAC</b> AGCACTGGGACCCCGAAACTGGTTGG<br>AACCTCATTTG<br>(bold: changed for crRNA binding purposes; underlined: SallI; G964D;<br>GGA» <b>GAC</b> )     |

\* The underlined bases indicate restriction sites designed for screening worms for the desired mutations, and the bases labeled in red code for the amino acid that was mutated. Additional silent base changes made because they were necessary for creating or removing the restriction sites have not been indicated.

**Supplementary Table 8. Primers for construction of transcriptional and translational reporter strains.**

| Strain | Genotype       | Name and Sequence*                                                                                                                      |
|--------|----------------|-----------------------------------------------------------------------------------------------------------------------------------------|
| RAB72  | <i>rebEx15</i> | nemt-1p_SalI_Fwd<br>GCGCG <u>TCGAC</u> CGAAAATCTCAAGTCTTGTCTTAA**<br>nemt-1p_NotI_Rev<br>CATGGCGGCCGCAGTGAATATGTGTTTACGAGTAAATG**       |
| RAB73  | <i>rebEx16</i> | pkal-1p_SalI_Fwd<br>GCGCG <u>TCGAC</u> GCTATAAATGGGTACCTGGCCGTAA**<br>pkal-1p_NotI_Rev<br>CATGGCGGCCGCCGTAGAGAAGAAACTGTGACAGTTC**       |
| RAB74  | <i>rebEx17</i> | C32E8.6p_SalI_Fwd<br>GCGCG <u>TCGAC</u> GTACCGGGAATCGAAAAATTGTCC**<br>C32E8.6p_NotI_Rev<br>CATGGCGGCCGCCTTATTGTACAGAATGTTTCTTTCC**      |
| RAB76  | <i>rebEx19</i> | nemt-1SL2_SalI_Fwd<br>GCGCG <u>TCGAC</u> CGAAAATCTCAAGTCTTGTCTTAA***<br>nemt-1SL2_NotI_Rev<br>CATGGCGGCCGCAGTGAATATGTGTTTACGAGTAAATG*** |
| RAB77  | <i>rebEx20</i> | pkal-1SL2_PstI_Fwd<br>CATGCTGCAGGCTATAAATGGGTACCTGGCCGTAA***<br>pkal-1SL2_NotI_Rev<br>CATGGCGGCCGCTCAATAGTACATTAGCCTATTCTTTTG***        |
| RAB78  | <i>rebEx21</i> | C32E8.6SL2_SalI_Fwd<br>GCGCG <u>TCGAC</u> GTACCGGGAATCGAAAAATTGTCC***<br>C32E8.6SL2_NotI_Rev<br>CATGGCGGCCGCTCAATGCAACATATGACGGACTAG*** |
| RAB81  | <i>rebEx22</i> | Y71H2B.1SL2_PstI_Fwd<br>CATGCTGCAGCCAGATGAAGAAAACGATGGAAC***<br>Y71H2B.1SL2_NotI_Rev<br>CATGGCGGCCGCTTAAACCCATCCCTCTGGAGGATT***         |
| RAB82  | <i>rebEx23</i> | C24A3.4SL2_SalI_Fwd<br>GCAGG <u>TCGAC</u> GGTCTCTACAGTGATGACTCATT***<br>C24A3.4SL2_NotI_Rev<br>CATGGCGGCCGCTCACAGCTTGGACCGCGCCGCAAA***  |

\*The underlined bases indicate restriction sites used for plasmid construction.

\*\*Used to amplify gene promoter for insertion into pPD114.108.

\*\*\*Used to promoter and gene from genomic DNA for insertion into pBS77-SL2-mCherry.

**Supplementary Table 9. Primers for construction of protein expression plasmids.**

| Purpose                                   | Name and sequence*                                               |
|-------------------------------------------|------------------------------------------------------------------|
| PKAL-1 expression vector                  | pkal-1_for<br>CATGCC <u>ATGGGGG</u> CGAAATATTATCCAGAAAC          |
|                                           | pkal-1_rev<br>CATGG <u>GCGCCGC</u> ATAGTACATTAGCCTATTC           |
| PKS-1_ACP <sub>1</sub> expression vector  | pks-1_acp1_for<br>GCGCC <u>ATGGGG</u> GCTTTCTGATGCGGAAATTGAGTC   |
|                                           | pks-1_acp1_rev<br>CATGG <u>GCGCCGC</u> AGTTGTTGCTTTAGTAACTGGAAC  |
| NRPS-1_ACP <sub>7</sub> expression vector | nrps-1_acp7_for<br>CATGCC <u>ATGGGG</u> GAGTGAAGACTCCGATGAAGAAGT |
|                                           | nrps-1_acp7_rev<br>CATGG <u>GCGCCGC</u> GCTCCGGACCCAGCGCTTTCTCAC |
| Mutagenesis of PKAL-1                     | pkal-1K488A_1<br>GTCAAGTGGGGCCATTCAAAGAATAG                      |
|                                           | pkal-1K488A_2<br>GATTTTGGCATCTCTTTTATAATTG                       |
| Mutagenesis of PKS-1_ACP <sub>1</sub>     | pks-1_acp1_1<br>ATATACCATGTACTGGTCTGATGCGGAAATTGAG               |
|                                           | pks-1_acp1_2<br>CTCCTTCTTAAAGTTAAACAAAATTATTC                    |
| Mutagenesis of NRPS-1_ACP <sub>7</sub>    | nrps-1_acp7_1<br>GTACAGTGAAGACTCCGATGAAG                         |
|                                           | nrps-1_acp7_2<br>CACATATATCTCCTTCTTAAAGTTAAAC                    |

\*The underlined bases indicate restriction sites used for plasmid construction.

## References

- 1 Trautman, E. P., Healy, A. R., Shine, E. E., Herzon, S. B. & Crawford, J. M. Domain-targeted metabolomics delineates the heterocycle assembly steps of colibactin biosynthesis. *J Am Chem Soc* **139**, 4195-4201 (2017).
- 2 Robert, X. & Gouet, P. Deciphering key features in protein structures with the new ENDscript server. *Nucleic Acids Res* **42**, W320-324 (2014).
- 3 Balibar, C. J., Vaillancourt, F. H. & Walsh, C. T. Generation of D amino acid residues in assembly of arthrofactin by dual condensation/epimerization domains. *Chem Biol* **12**, 1189-1200 (2005).
- 4 Kelley, L. A., Mezulis, S., Yates, C. M., Wass, M. N. & Sternberg, M. J. The Phyre2 web portal for protein modeling, prediction and analysis. *Nat Protoc* **10**, 845-858 (2015).
- 5 Cao, J. *et al.* Comprehensive single-cell transcriptional profiling of a multicellular organism. *Science* **357**, 661-667 (2017).
- 6 Hutter, H. & Suh, J. GExplore 1.4: An expanded web interface for queries on *Caenorhabditis elegans* protein and gene function. *Worm* **5**, e1234659 (2016).
- 7 Chen, B. *et al.* Dynamic imaging of genomic loci in living human cells by an optimized CRISPR/Cas system. *Cell* **155**, 1479-1491 (2013).
